1  
2  
3  
4  
5  
6  
7  
8  
9  
10  
11  
12  
13  
14  
15  
16  
17  
18  
19  
20  
21  
22  
23

Dimensions of anxiety and depression and neurophysiological indicators of error-monitoring:  
Relationship with delta and theta oscillatory power and error-related negativity amplitude  
Alexandra M. Muir<sup>1</sup>, Ariana Hedges-Muncy<sup>1</sup>, Ann Clawson<sup>2</sup>, Kaylie A. Carbine<sup>1</sup>, Michael J.  
Larson<sup>1,3</sup>

<sup>1</sup>Department of Psychology, Brigham Young University

<sup>2</sup>Department of Neuropsychology, Children’s National Hospital

<sup>3</sup>Neuroscience Center, Brigham Young University

Correspondence concerning this article should be sent to: Michael J. Larson, Ph.D., Department  
of Psychology and Neuroscience Center, Brigham Young University, 244 TLRB, Provo, UT  
84602. Email: michael\_larson@byu.edu; Telephone: 801-422-6125

24 Impact Statement

25 In line with the RDoC framework, we tested the relationship between anxiety and  
26 depressive symptom dimensions and neural indices of error-processing (delta and theta power,  
27 error-related negativity ERP amplitude) in 178 participants with a range of pathology symptoms.  
28 A non-significant relationship emerged between neural and symptom measures suggesting  
29 anxiety and depressive symptomology have a nuanced relationship with error-monitoring in a  
30 large sample across a range of anxiety and depression symptoms.

31

32

33

34

35

36

37

38

39

40

41

42

43

44

45

46

47 Abstract

48 Error-monitoring processes may be affected by transdiagnostic dimensions of psychopathology  
49 symptoms including trait anxiety, worry, and severity of depressive symptoms. We tested the  
50 relationship between continuous measures of anxiety and depressive symptomology and neural  
51 correlates of error-monitoring as measured by time-frequency domain delta and theta oscillatory  
52 power and time domain error-related negativity (ERN) amplitude extracted from the  
53 electroencephalogram (EEG). Secondary analyses tested for diagnostic group differences in  
54 error-related neural responses in individuals with generalized anxiety disorder (GAD), major  
55 depressive disorder (MDD), and comorbid psychiatric disorders. 178 participants (104 female,  
56  $M[SD]_{age} = 21.7[4.6]$ ) with a wide range of psychopathology symptoms completed a modified  
57 version of the Eriksen flanker task and symptom questionnaires. Residualized difference values  
58 between correct and error trials for delta/theta power and error/correct ERN amplitude were  
59 dependent variables. Linear regression analyses adjusted for age and sex showed nonsignificant  
60 associations of symptom dimension measures with error-related residualized delta/theta power or  
61 residualized ERN amplitude. Subset analyses on those with confirmed psychopathology  
62 diagnoses also did not predict residualized error-related delta/theta power nor ERN amplitude.  
63 Exploratory analyses with only error trial delta/theta power and ERN amplitude also revealed  
64 nonsignificant relationships. Taken in the context of previous literature, results suggest a  
65 heterogeneous relationship between depressive and anxiety symptom dimensions and  
66 neurophysiological indices of error-monitoring.

67 *Keywords:* delta power, theta power, error-related negativity, GAD, MDD, comorbid disorders

68

69

70 **1 Introduction**

71 Error-monitoring, an individual's ability to detect an incorrect response and subsequently  
72 adjust to improve future behavior, is an essential skill to achieve successful goal-directed  
73 behavior (Mohamed, Börger, Geuze, & van der Meere, 2019; Rabbitt & Rodgers, 1977).  
74 Individual differences in error-monitoring may be related to personality traits and transdiagnostic  
75 psychopathology symptoms, such as worry, negative affect, impulsivity, and conscientiousness  
76 (Hill, Samuel, & Foti, 2016; Moser, Moran, & Jendrusina, 2012). Error-monitoring processes are  
77 altered in individuals with psychopathology. For example, individuals with generalized anxiety  
78 disorder and obsessive-compulsive disorder have heightened error-monitoring processes (Riesel,  
79 Kathmann, & Endrass, 2014; Weinberg, Olvet, & Hajcak, 2010); however, the relationship  
80 between error-monitoring processes and symptoms of psychopathology is heterogeneous for  
81 other disorders such as major depressive disorder (Aarts, Vanderhasselt, Otte, Baeken, &  
82 Pourtois, 2013; Gorka & Phan, 2017; Weinberg, Liu, & Shankman, 2016). We tested the  
83 relationship between transdiagnostic symptom dimensions of depression and anxiety and  
84 neurophysiological reflections of error-monitoring processes, including event-related potentials  
85 (ERP) and electroencephalogram (EEG) oscillatory power in a sample with a wide range of  
86 psychopathology symptoms. A secondary aim was to test diagnostic group differences in  
87 neurophysiological responses to errors in individuals with confirmed diagnoses of generalized  
88 anxiety disorder (GAD), major depressive disorder (MDD), and comorbid psychiatric disorders.

89 **1.1 Neurophysiological Measures of Error Monitoring**

90 The error-related negativity (ERN) is an ERP often used to quantify neural manifestations of  
91 error-monitoring. The ERN is a negative deflection in the ERP waveform approximately 0 to 150  
92 ms following an erroneous response (Gehring, Goss, Coles, Meyer, & Donchin, 1993) that

93 originates in the anterior cingulate cortex (ACC; van Veen & Carter, 2002). Despite numerous  
94 theories concerning the functional significance of the ERN, the current consensus is that the  
95 ERN represents an early monitoring system interpreting cognitive or emotional responses to  
96 errors, after which additional cognitive resources are recruited to improve future behavior  
97 (Gehring et al., 1993; Larson, Clayson, & Clawson, 2014; Proudfit, Inzlicht, & Mennin, 2013;  
98 Weinberg, Liu, Hajcak, & Shankman, 2015).

99 In addition to time domain measures, analyses of EEG data in the time and frequency  
100 domains can be used to quantify neural response to errors. Time-frequency analyses measure the  
101 magnitude of frequency band oscillations and are thought to reflect increased synchronization of  
102 a group of neurons working together to produce a cognitive response (Buzaski, 2006). While  
103 time domain measures such as ERN amplitude capture phase-locked data, time-frequency  
104 measures capture both phase- and non-phase locked data, resulting in a richer representation of  
105 the EEG signal (Cohen, 2014). Thus, utilization of both time and time-frequency measures to  
106 quantify neural response to errors provides a rich and holistic view of the neurophysiological  
107 processes related to error-monitoring.

108 Oscillations in the delta (1-3 Hz) and theta (4-8 Hz) frequency bands are thought to reflect  
109 error-monitoring processes. Specifically, both midline delta and theta activity increase directly  
110 following an incorrect response compared to following correct responses (Cavanagh, Cohen, &  
111 Allen, 2009; Luu & Tucker, 2001; Munneke, Nap, Schippers, & Cohen, 2015) and are present in  
112 frequency decompositions of the ERN (Luu & Tucker, 2001; Yordanova, Falkenstein,  
113 Hohnsbein, & Kolev, 2004). The functional roles of delta- and theta-band activity may also be  
114 dissociable (Cohen & Cavanagh, 2011), with evidence suggesting that the delta-band is primarily  
115 associated with error-monitoring, while theta-band activity includes both conflict- (i.e., the

116 simultaneous presentation of competing options) and error-related processes (Cohen &  
117 Cavanagh, 2011). The ERN and delta/theta oscillatory power quantify both similar and  
118 independent portions of neural signal (Cavanagh, Meyer, & Hajcak, 2017; Munneke et al.,  
119 2015), suggesting the utility of using both the ERP and oscillation-based measures to quantify  
120 neural indices of error-monitoring.

## 121 **1.2 Symptoms of Anxiety and Depression and Error-Monitoring Processes**

122 There is increasing focus on the relationship between symptom dimensions of  
123 psychopathology on a continuous scale and error-monitoring processes, regardless of formal  
124 psychiatric diagnosis (i.e., a transdiagnostic approach). This approach is in line with the  
125 Research Domain Criteria (RDoC) initiative, which aims to establish cognitive and behavioral  
126 constructs under which psychopathology can be studied, regardless of traditional diagnostic  
127 labels. In the past, diagnostic status was used to group individuals, after which those group  
128 differences in error-monitoring were tested (i.e., Aarts et al., 2013; Weinberg et al., 2010).  
129 However, it is possible traditional nosology of psychopathology may not be valid nor capture  
130 underlying aberrant biology that results in presentation of abnormal behavior (Cuthbert & Insel,  
131 2013). Error-monitoring processes fit well in the RDoC framework, as error-monitoring has the  
132 potential to link psychopathology to underlying deviant neural functioning that affects outward  
133 behavior (Hanna & Gehring, 2016). Thus, investigating relationships between transdiagnostic  
134 symptom dimensions and personality traits in samples with a wide range of psychopathology  
135 symptoms allows for a better understanding of what factors may influence individual differences  
136 in error-monitoring abilities. The primary approach employed in the current study was to use  
137 individual difference psychopathology symptom measures to test for relationships with error-  
138 related neurophysiology, regardless of psychiatric diagnosis.

139 Trait anxiety is a stable personality trait in which an individual tends to be in a continuously  
140 anxious state (Kennedy, Schwab, Morris, & Beldia, 2001). Individuals high on trait anxiety show  
141 greater frontal midline theta when compared to those lower on scales of trait anxiety (Schmidt,  
142 Kanis, Holroyd, Miltner, & Hewig, 2018); however, other results suggest no relationship  
143 between trait anxiety and midline theta (Neo & McNaughton, 2011). In the time domain, larger  
144 ERN component amplitude is related to higher trait anxiety scores (Olvet & Hajcak, 2008),  
145 which has been interpreted as an indicator of greater expectancy violation in individuals with  
146 higher trait anxiety (Compton et al., 2007). When examining the relationship between anxiety  
147 symptoms and neural mechanisms of error-monitoring, it is important to dissociate state anxiety  
148 from trait anxiety. Anxiety inducing paradigms produced no change in ERN amplitude (Moser,  
149 Hajcak, & Simons, 2005) suggesting the ERN is trait-like in nature (Olvet & Hajcak, 2008).  
150 Therefore, in the current study, only the trait subscale of the State Trait Anxiety Inventory  
151 (STAI) was used to investigate the relationship between trait anxiety and neural measures of  
152 error-monitoring.

153 Along with trait anxiety, anxious apprehension (i.e., worry), depressive symptomology, and  
154 biological sex may be factors influencing the neurophysiological representations of error-  
155 monitoring processes. Anxious apprehension (i.e., worry) is a cognitive component of anxiety  
156 where worrisome thoughts dominate day to day life (Nitschke, Heller, Imig, McDonald, &  
157 Miller, 2001). Individuals who scored high on measures of anxious apprehension, regardless of  
158 diagnosis, displayed enhanced ERN amplitude when compared to controls (Hajcak, McDonald,  
159 & Simons, 2003; Moser et al., 2012; Moser, Moran, Kneip, Schroder, & Larson, 2016; Moser,  
160 Moran, Schroder, Donnellan, & Yeung, 2013). When looking at the relationship between  
161 depressive symptomology and error monitoring processes, there is great heterogeneity in the

162 literature with some evidence that ERN amplitude is not related to depressive symptoms (Chang,  
163 Davies, & Gavin, 2010; Schroder, Moran, Infantolino, & Moser, 2013). Other research indicates  
164 that ERN amplitude is related to facets of melancholia (Weinberg et al., 2016), suggesting that  
165 the ERN may be more specifically related to facets of depression rather than depressive  
166 symptoms as a whole. In addition to the possible modulation of ERN amplitude by worry and  
167 depressive symptomology, ERN amplitude may differ as a function of biological sex; however  
168 the current literature is unclear as to whether men or women display greater ERN amplitudes  
169 (Fischer, Danielmeier, Villringer, Klein, & Ullsperger, 2016; Hill, Ait Oumeziane, Novak,  
170 Rollock, & Foti, 2018; Larson, South, & Clayson, 2011; Moser et al., 2016). Thus, it is important  
171 to account for biological sex when examining individual differences in error-monitoring.

### 172 **1.3 Diagnostic Status and Error-Monitoring Processes**

173 There is a significant amount of heterogeneity in studies of error-monitoring processes within  
174 individuals formally diagnosed with MDD, GAD, or comorbid disorders. ERN amplitude is  
175 generally heightened in individuals with anxiety disorders such as GAD (Meyer, Nelson,  
176 Perlman, Klein, & Kotov, 2018; Weinberg, Liu, et al., 2015) and enhanced theta power reliably  
177 dissociated individuals with GAD from psychiatrically healthy controls (Cavanagh et al., 2017).  
178 However, there is also evidence that ERN amplitude is unchanged in people with diagnosed  
179 GAD (Kujawa et al., 2016; Xiao et al., 2011). In individuals with comorbid anxiety and  
180 depression, there is evidence that ERN amplitude is unchanged from psychiatrically healthy  
181 controls (Weinberg, Klein, & Hajcak, 2012; Weinberg, Kotov, & Proudfit, 2015), implying  
182 comorbid depression may moderate the relationship between ERN amplitude and GAD  
183 diagnostic status. When looking at individuals diagnosed with MDD, although there is some  
184 evidence that individuals with MDD have an enhanced ERN when compared to controls (Aarts



185 et al., 2013; Chiu & Deldin, 2007; Holmes & Pizzagalli, 2008, 2010), other evidence suggests  
186 that either ERN amplitude is blunted (Olvet, Klein, & Hajcak, 2010; Weinberg et al., 2016), or  
187 that there is no difference in ERN amplitude between those with MDD and those without (Gorka  
188 & Phan, 2017; Moran, Schroder, Kneip, & Moser, 2017; Weinberg et al., 2012). In addition to  
189 this heterogeneity of evidence, there is a lack of evidence present concerning error-related delta  
190 and theta power in relation to GAD, MDD, and comorbid disorders. As such, combining time  
191 domain and time-frequency domain measures of error processing in GAD, MDD, and comorbid  
192 disorders may assist in elucidating the relationship between diagnostic status and neural indices  
193 of error-monitoring.

#### 194 **1.4 Aims and Hypotheses**

195         The current study had two aims. Our primary aim was to quantify the relationship  
196 between symptom dimensions of trait anxiety, worry, and depressive symptomology and error-  
197 monitoring processes in individuals with a wide range of symptoms regardless of psychiatric  
198 diagnosis using commonly utilized measures of psychopathology. To isolate error-related  
199 activity instead of general response-related activity, residualized difference values between  
200 correct and error trials for delta/theta power and ERN amplitude were used as the dependent  
201 variable of interest (Meyer, Lerner, Reyes, Laird, & Hajcak, 2017). We hypothesized, based on  
202 the current literature, that higher trait anxiety and worry would be related to residual delta power,  
203 theta power, and ERN amplitude. Due to the heterogeneity of the literature, we also hypothesized  
204 there would be no relationship between depressive symptoms and residual delta power, theta  
205 power, and ERN amplitude. A secondary aim of the current study was to characterize error-  
206 monitoring processes in individuals with a diagnosis of GAD, MDD, or comorbid disorders.  
207 Similar to the previous hypotheses, we hypothesized that individuals with GAD would have

208 greater residualized delta power, theta power, and ERN amplitude when compared to  
209 psychiatrically healthy controls, but there would be no difference in dependent variables between  
210 those with MDD, comorbid disorders, and controls.

## 211 **2 Method**

212 All data and code are posted on the Open Science Framework (OSF) and can be found at  
213 <https://osf.io/pujsv>. All methods are in compliance with the methodological reporting checklist  
214 for EEG/ERP data as outlined in Keil et al. (2014; see also Clayson, Carbine, Baldwin, &  
215 Larson, 2019). A subset of the current data testing different data aspects and hypotheses have  
216 been previously published (see Baldwin, Larson, & Clayson, 2015; Clawson, Clayson, & Larson,  
217 2013).

### 218 **2.1 Participants**

219 Procedures were approved by the Brigham Young University Institutional Review Board.  
220 Psychiatrically-healthy control participants were recruited through undergraduate psychology  
221 courses, whereas individuals with psychiatric diagnoses and elevated symptoms of  
222 psychopathology were recruited through flyers placed at the local university counseling center  
223 and community mental health centers. All participants were compensated through course credit  
224 or monetary payment.

225 The final sample consisted of 178 participants (female = 104;  $M(SD)_{age} = 21.7[4.6]$ ). For  
226 those with psychopathology, diagnoses were initially made by a psychiatrist, psychologist, or  
227 physician in the community and subsequently confirmed upon enrollment using the Mini-  
228 International Neuropsychiatric Inventory (MINI; Sheehan et al., 1998). The MINI has a high  
229 concordance rate with the Structured Clinical Interview for DSM-IV Axis I disorders (SCID) but  
230 requires less time to administer (Sheehan et al., 1998). Participants were excluded if they had

231 medication changes within the two months prior to data collection, they had a diagnosis of a  
232 psychotic or bipolar disorder, they reported a learning disorder or attention deficit/hyperactivity  
233 disorder, they had a history of substance use or dependence, neurological disease, or they were  
234 left-handed. At the time of participation 33.1% of all participants were taking a psychotropic  
235 medication (GAD = 78.6%, MDD = 60.7%, Comorbid = 58.8% [see Table S1 in the  
236 supplementary material on OSF for a list of comorbid disorders] No confirmed diagnosis =  
237 61.8%, Control = 0%). The proportion of participants taking psychotropic medications did not  
238 differ between the three (GAD, MDD, comorbid) psychopathology groups ( $\chi^2(2) = 1.62, p =$   
239 0.44; see Table S2 in the supplementary material on OSF).

240 Participants were excluded if they had ERP noise levels greater than 20 (root mean  
241 square of the residual noise after the consistent ERP is canceled by inverting every other trial;  
242 see Schimmel, 1967), if they had less than 50% accuracy on the computerized tasks, or if they  
243 had missing or incomplete questionnaire data. To ensure similar number of trials for the  
244 oscillatory power and ERP analyses, all participants had a minimum of ten useable trials for all  
245 conditions. Because reliability is a product of the context of a current sample and study (Clayson  
246 & Miller, 2017a) dependability of ERN amplitude (for both error and correct trials) was  
247 estimated using the ERP Reliability Analysis Toolkit in Matlab (Clayson & Miller, 2017b). This  
248 toolkit uses generalizability theory to estimate the g-theory reliability analogue known as  
249 dependability in ERP components. The error trials had an average dependability of 0.63 and the  
250 correct trials had an average dependability of 0.86.

251 Of the 178 participants, 32 participants who originally indicated they had a psychiatric  
252 diagnosis were excluded from secondary diagnostic analyses due to a lack MINI confirmation of  
253 their diagnostic status (i.e., they were diagnosed by a practitioner in the community, but the

254 diagnosis was not confirmed by MINI administration in the lab). Thus, the final sample for our  
255 secondary diagnostic subgroup secondary analyses consisted of 146 participants (87 controls, 61  
256 individuals with psychopathology;  $M(SD)_{age} = 21.3(3.4)$ , female = 87;  $n_{GAD} = 14$ ;  $n_{MDD} = 28$ ;  
257  $n_{Comorbid} = 19$ ;  $n_{Control} = 85$ ). In order to be included in the comorbid group, the participant had to  
258 have a confirmed diagnosis of either GAD or MDD, comorbid with any other disorder(s) (see  
259 Table S1).

## 260 **2.2 Experimental Procedures**

261       Upon entering the lab, informed consent was obtained after which participants completed  
262 a battery of cognitive tests and questionnaires. Cognitive tests included the Rey-Auditory Verbal  
263 Learning Test (RAVLT), Trail Making Test parts A and B, Digit Span forward and backward,  
264 Controlled Oral Word Association Test, and animal fluency. The State Trait Anxiety Inventory  
265 (STAI), Penn State Worry Questionnaire (PSWQ), and Beck Depression Inventory-Second  
266 Edition (BDI-II) were administered as measures of psychiatric symptom severity. All measures  
267 collected are reported here for the sake of transparency; however only the BDI-II, STAI, and  
268 PSWQ, measures commonly used in clinical settings for psychopathology symptom  
269 quantification, were used in the data analyses of the current paper. Therefore, no further  
270 information will be reported on the other measures (see Baldwin et al., 2015 & Clawson et al.,  
271 2013 for comprehensive information). Information on the psychometric properties of the  
272 measures included is reported below in section 2.3.

273       Following completion of the neuropsychological tests and symptom questionnaires,  
274 participants completed a modified arrow version of the Eriksen flanker task (Eriksen & Eriksen,  
275 1974). Participants were presented with five arrows and asked to respond to the direction of the  
276 point of the middle arrow with an index or middle finger button press. There was a total of 798

277 randomly presented trials with 354 trials (45%) being congruent (e.g., <<<<<) and 444 trials  
278 being incongruent (55%) (e.g., <<><<). Participants completed a practice block of 24 trials prior  
279 to the beginning of the task to ensure understanding. Stimuli were presented in white 36-point  
280 Arial font on a black background on a 17-inch computer approximately 20 inches from the  
281 participant. Flanking arrows were presented for 100 ms followed by the target arrow which was  
282 presented for an additional 600 ms. Subsequently, a fixation cross was shown for a jittered  
283 intertrial interval of 800, 1000, or 1200 ms. Responses occurring over 1600 ms after stimulus  
284 presentation were seen as an error of omission and were not included in the data analyses as the  
285 next trial was queued after 1600 ms.

### 286 **2.3 Measures**

287 Means and standard deviations along with Chronbach's alpha (overall and by group) are  
288 presented in Table 1. The Beck Depression Inventory, Second Edition (BDI-II; Beck, Steer, &  
289 Brown, 1996) was used to quantify depressive symptoms. Participants were asked to rate 21  
290 statements on a scale from 0 (I do not feel sad) to 3 (I am so sad or unhappy that I can't stand it)  
291 after which individual item scores were summed to a total score. Possible scores range from 0 to  
292 63. The BDI-II has been shown to have a high level of internal consistency (Chronbach's alpha  
293 .89-.93; Beck et al., 1996; Whisman, Perez, & Ramel, 2000).

294 The State Trait Anxiety Inventory (STAI form Y-2) was used to quantify trait anxiety  
295 symptoms (Speilberger, Gorsuch, & Lushere, 1970). Items on the STAI include statements such  
296 as "I feel calm" or "I am worried". Participants were asked to rank the statements on a four-point  
297 Likert type scale ranging from "not at all" (1) to "very much" (4). Because only trait anxiety is of  
298 interest to the current study, we just used trait anxiety subscale score was used for analyses.  
299 Possible scores on the STAI trait subscale range from 20-80. In previous studies, the STAI

300 shows good internal consistency (Chronbach's  $\alpha > .7$ ; Bergua et al., 2012; Spielberger et al.,  
301 1970).

302 The Penn State Worry Questionnaire (PSWQ; Meyer, Miller, Metzger, & Borkovec,  
303 1990) was used to quantify anxious apprehension and worry symptoms. Participants were  
304 presented with 16 items and asked to rank their feelings on a 5-point Likert scale from “Not at all  
305 typical of me” (+1) to “Very typical of me” (+5). Items were reverse scored as needed and total  
306 score for the PSWQ was calculated through the summing of each item. Possible scores on the  
307 PSWQ range from 0-80. The PSWQ has good validity and internal consistency (Meyer et al.,  
308 1990).

#### 309 **2.4 Electroencephalogram recording and reduction**

310 Data were collected from 128 equidistant passive Ag/AgCl electrodes on a hydrocel  
311 sensor net from Electrical Geodesics, Inc. using a NA 300 amplifier system (EGI; Eugene, OR;  
312 20K nominal gain, bandpass = 0.01 – 100 Hz). During data collection, all data were referenced to  
313 the vertex electrode (Cz) and digitized continuously at 250 Hz with a 16-bit analog to digital  
314 converter. Per the manufacturer’s recommendation, impedances were kept at or below 50 k $\Omega$ .  
315 Offline, all data were digitally high-pass filtered at 0.05 Hz filter and digitally low-pass filtered  
316 at 30 Hz in NetStation (v 5.3.0.1). Data were then segmented from -1000 ms before response  
317 until 1000 ms after response for both correct and error trials for the time-frequency analyses, and  
318 400 ms before response to 800 ms after correct and erroneous responses for ERN analyses.  
319 Segmentation was extended for the time-frequency analyses from the traditional ERN  
320 segmentation in order to create a long enough epoch to extract low delta frequencies and to avoid  
321 edge artifacts common in time-frequency analyses (Cohen, 2014). For both the ERN and time-  
322 frequency measures, following segmentation eye movements and blink artifacts were corrected

323 using independent components analysis (ICA) in the ERP PCA toolkit in Matlab (Dien, 2010). If  
324 any ICA component correlated with two blink templates (one template being provided by the  
325 ERP PCA Toolkit (Dien, 2010) and one template being derived from previous data by the  
326 authors) at a rate of 0.9 or higher, the specific component was removed from the data (Dien,  
327 2010). Additionally, if the differential average amplitude was greater than 50 microvolts or if the  
328 fast average amplitude of a particular channel was greater than 100 microvolts, the channel was  
329 defined as bad and the nearest neighbor approach (using six electrodes) was used to interpolate  
330 the data for that electrode (Dien, 2010). Following artifact correction, data were re-referenced to  
331 an average reference in the ERP PCA toolkit in Matlab and baseline adjusted from 400 ms to 200  
332 ms pre-response for all measures.

#### 333 **2.4.1 Time-Frequency Data Reduction**

334 Time-frequency power values were extracted through Matlab (R2018a) from four fronto-  
335 central electrodes (6 [FCz], 7, 106, 129 [Cz]; see Larson et al., 2014 for electrode montage).  
336 These electrodes were chosen as we were combining both time- and time-frequency domain  
337 indices of error-monitoring, and ERN amplitude is maximal over fronto-central electrodes (e.g.,  
338 Clawson, South, Baldwin, & Larson, 2017). Twelve log-spaced frequencies ranging from 1.5 Hz  
339 to 14 Hz were used for a complex Morlet wavelet convolution with trial averaged EEG data. To  
340 avoid edge artifacts that are common in time-frequency analyses (Cohen, 2014), 300 ms of data  
341 were removed from the epoch, with 100 ms being removed pre-stimulus and 200 ms being  
342 removed at the very end prior to convolution. This resulted in a final epoch of 900 ms before  
343 response until 800 ms after. Due to the imbalance of correct and error trials, a random  
344 permutation of correct trials matching the number of error trials were selected for each  
345 participant (Cohen, 2014) as to not bias results towards one trial type or the other. Thus, each

346 participant had the same number of error and correct trials for all analyses (all trial numbers per  
347 group are reported in Table 2). After, wavelet convolution was performed using complex Morlet  
348 wavelets, data were decibel baseline normalized with a condition-average from 400 ms to 200  
349 ms prior to response. Data were then grand averaged across all groups and visually inspected to  
350 determine a time window from which to extract delta and theta power values (similar to the  
351 collapsed localizer approach advocated in Luck & Gaspelin, 2017). The time window chosen  
352 was 0 to 150 ms following response, which is consistent with previous research examining error-  
353 related neural activity (Dehaene, Posner, & Tucker, 1994; Gehring et al., 1993). Average delta  
354 power for correct and error trials was extracted from the 1-4 Hz range while average theta power  
355 was extracted from the 4-8 Hz range.

#### 356 **2.4.2 Error-Related Negativity Data Reduction**

357 Event-related potential values were extracted using Matlab (R2018a) and R (v. 1.1.463)  
358 from the same four fronto-central electrodes (6 [FCz], 7, 106, 129 [Cz]). After all data were  
359 baseline adjusted from 400 ms to 200 ms pre-response, mean amplitude was extracted for both  
360 error and correct trials (ERN and CRN amplitude respectively for time-domain measures) from 0  
361 to 150 ms post-response. Mean amplitude measure was employed due to research suggesting the  
362 mean amplitude is more reliable than other ERP peak measures (Clawson et al., 2013; Luck,  
363 2005). All means and standard deviations of dependent variables and trial numbers are reported  
364 in Table 2.

### 365 **2.5 Data Analysis**

#### 366 **2.5.1 Questionnaire and Behavioral Data**

367 All statistical analyses were performed in R (v 3.5.2). To determine if individuals with a  
368 diagnosis of pathology did indeed present with greater anxiety and depressive symptoms, three



369 4-group (GAD, MDD, Comorbid, Control) one-way ANOVAs were conducted, one for each  
370 questionnaire (BDI, PSWQ, STAI Trait) with generalized eta squared ( $\eta^2$ ) used as a measure of  
371 effect size. Post-hoc Tukey HSD were used to adjust significant group differences.

372 For the behavioral data, mean accuracy and median response time (RT) were calculated  
373 overall and as a function of congruency. In the flanker task, it is expected that accuracy will be  
374 lower and response time will be longer for incongruent versus congruent trials. Two 4-group by  
375 2-congruency (congruent, incongruent) repeated measures analysis of variances (ANOVAs) were  
376 conducted with accuracy and RT as dependent variables and general eta squared ( $\eta^2$ ) used as a  
377 measure of effect size. Either paired samples *t*-tests (for within-subjects) with Cohen's  $d_z$  for  
378 effect size or follow-up one way ANOVAs with generalized eta squared for effect size were used  
379 to decompose any significant main effects or interactions

380 Pearson's correlations between residualized delta/theta power and residualized ERN  
381 amplitude and all three questionnaires were conducted to characterize the relationship between  
382 all six variables.

### 383 **2.5.3 Continuous Linear Regressions**

384 As a manipulation check, three paired samples *t*-tests were initially conducted on the  
385 whole sample to ensure that error trials demonstrated greater delta and theta power and more  
386 negative ERN amplitude when compared to the correct-related negativity (CRN).

387 In order to isolate error-related brain activity from response-related activity, the residuals  
388 between correct and error power and ERP amplitude were used as the dependent variable for the  
389 subsequent regressions. Error trials were used as the outcome variable and correct trials were  
390 used as the predictor in creation of the residualized difference scores (Meyer et al., 2017).

391 To test our first hypothesis that transdiagnostic measures of anxiety, worry, and  
392 depressive symptoms would predict delta power values, theta power values, and ERN amplitude,  
393 nine linear regressions were performed. In order to account for the large amount of linear  
394 regressions being performed it was decided *a priori* that only *p*-values less than 0.01 would be  
395 interpreted as significant in order to control for family wise error-rate. Age and sex were entered  
396 into linear regressions as predictors due to evidence that ERN amplitude may vary as a function  
397 of sex (Fischer et al., 2016; Hill et al., 2018; Larson et al., 2011; Moser et al., 2016) and that  
398 ERN amplitude increases as an individual ages (Tamnes, Walhovd, Torstveit, Sells, & Fjell,  
399 2013). Each linear regression used one questionnaire as an independent variable of interest (BDI,  
400 STAI Trait, or PSWQ) to predict one dependent variable (residual delta power, residual theta  
401 power, residual ERN). Separate regressions were used as the BDI and STAI Trait scales were  
402 found to be highly correlated, and, therefore, could not be entered in the same regression.  
403 Normality of residuals was adequate.

#### 404 **2.5.4 Diagnostic Linear Regressions**

405 To test our second hypothesis that diagnostic group would predict greater delta residual  
406 power, theta residual power, and residual ERN amplitude, three linear regressions were  
407 performed. Group (GAD, MDD, comorbid, control), age, and sex were used to predict delta  
408 residual power, theta residual power, and residual ERN amplitude. The group variable was  
409 entered as a factored variable (i.e., dummy coded), with GAD serving as the contrast variable for  
410 each of the linear regressions.

#### 411 **2.6 Sensitivity Analysis**

412 A sensitivity analysis performed in G\*Power (v 3.1) revealed that for both the continuous  
413 and diagnostic linear regressions, the current sample is adequately powered to detect a small-to-

414 medium  $f^2$  effect. Specifically, for the continuous linear regressions, a sensitivity analysis for a  
415 linear multiple regression fixed model,  $R^2$  deviation from zero at an alpha level of 0.01, power of  
416 0.80, and 3 predictors (individual questionnaire, age, sex) with a total sample size of 178 reveals  
417 sensitivity to detect an small-to-medium  $f^2$  effect size of 0.09. For the secondary diagnostic linear  
418 regressions, analyses revealed that with a total sample size of 148 participants and five predictors  
419 (three diagnostic groups [with GAD set as the reference group], age, sex), we were powered to  
420 detect a  $f^2$  of 0.13; both sets of linear regressions are powered to detect small to medium effects  
421 (Cohen, 1988). Thus, we are confident the results of the current study were not due to lack of  
422 statistical power.

### 423 **3 Results**

#### 424 **3.1 Questionnaire and Behavioral Data**

425 A one-way ANOVA with BDI total score as a dependent variable revealed a difference  
426 between groups ( $F(3,142) = 35.5, p < .001, \eta^2 = 0.43$ ). Individuals with psychopathology,  
427 regardless of diagnosis, had significantly higher BDI scores when compared to controls, but  
428 pathology groups did not significantly differ ( $p_{\text{GAD v Control}} < .01, p_{\text{MDD v Control}} < .01, p_{\text{Comorbid v}}$   
429  $\text{Control}} < .01; p_{\text{GAD v MDD}} = .62, p_{\text{GAD v Comorbid}} = .06, p_{\text{Comorbid v MDD}} = .36$ ). Group differences  
430 between PSWQ score were evident ( $F(3,137) = 11.1, p < 0.001, \eta^2 = 0.20$ ) with individuals with  
431 psychopathology, regardless of diagnosis, having higher PSWQ scores when compared to  
432 controls and no differences amongst pathology groups ( $p_{\text{GAD \& Control}} = .01, p_{\text{MDD \& Control}} = .01,$   
433  $p_{\text{Comorbid \& Control}} < .01; p_{\text{GAD \& MDD}} = .87, p_{\text{GAD \& Comorbid}} = .83, p_{\text{Comorbid \& MDD}} = .26$ ). Lastly,  
434 individuals with psychopathology had significantly higher STAI Trait scores when compared to  
435 controls ( $F(3,140) = 64.4, p < .001, \eta^2 = 0.58; p_{\text{GAD v Control}} < .01, p_{\text{MDD v Control}} < .01, p_{\text{Comorbid v}}$

436 Control < .01), but no difference between individuals with psychopathology ( $p_{GAD \vee MDD} = .99$ ,  $p_{GAD$   
437  $\vee$  Comorbid = .18,  $p_{Comorbid \vee MDD} = .08$ ).

438 All behavioral (RT and accuracy) data is reported by group in Table 3. Overall accuracy  
439 for the flanker task was 91% and overall median response time was 413 ms. Paired samples *t*-  
440 tests confirmed that for the overall sample, there was lower accuracy and longer response time  
441 for incongruent trials when compared to congruent trials ( $t_{accuracy}(177) = 18.6$ ,  $p < .001$ ,  $d_z = 1.4$ ;  
442  $t_{response\ time}(177) = 154.8$ ,  $p < .001$ ,  $d_z = 11.6$ ). For accuracy in the smaller diagnostic sample,  
443 there was a main effect of congruency ( $F(1,142) = 216.8$ ,  $p < .001$ ,  $\eta^2 = 0.25$ ) as expected, there  
444 was no main effect of group ( $F(3,142) = 1.63$ ,  $p = .18$ ,  $\eta^2 = 0.03$ ), but this was qualified by a  
445 significant group by congruency interaction ( $F(3,142) = 3.2$ ,  $p = .03$ ,  $\eta^2 = 0.01$ ). A paired  
446 samples *t*-test confirmed there was greater accuracy for congruent versus incongruent trials  
447 ( $t(145) = 16.3$ ,  $p < .001$ ,  $d_z = 1.4$ ). One-way ANOVAs revealed that groups did not differ on  
448 accuracy for congruent trials ( $F(3,142) = 0.43$ ,  $p = .74$ ,  $\eta^2 = 0.01$ ), but did on incongruent  
449 trials ( $F(3,142) = 2.70$ ,  $p = .05$ ,  $\eta^2 = 0.05$ ). However, post-hoc tests revealed no individual group  
450 comparisons reached statistical significance (closest *p*-value = .06 between control participants  
451 and individuals with MDD). Thus, no clear differences in accuracy based on congruency and  
452 group emerged.

453 For response times in the diagnostic sample, there was a main effect of congruency  
454 ( $F(1,142) = 1660.1$ ,  $p < .001$ ,  $\eta^2 = 0.43$ ) and a congruency by group interaction ( $F(3,142) = 4.05$ ,  
455  $p = .008$ ,  $\eta^2 = 0.01$ ), but no main effect of group ( $F(3,142) = 1.65$ ,  $p = .18$ ,  $\eta^2 = 0.03$ ). A paired  
456 samples *t*-test confirmed response times were longer on incongruent trials when compared to  
457 congruent trials ( $t(145) = -49.1$ ,  $p < .001$ ,  $d_z = -4.1$ ) as expected. Follow-up one-way ANOVAs

458 revealed no differences in response times for any group for both congruent ( $F(3,142) = 1.68, p =$   
459  $.17, \eta^2 = 0.03$ ) and incongruent trials ( $F(3,142) = 1.93, p = .13, \eta^2 = 0.04$ ).

460

### 461 **3.4 Transdiagnostic Regression Analyses**

462 In the full sample, error trials were associated with greater delta and theta power (delta:  
463  $t(177) = 10.1, p < .001, d_z = 1.0, M(SD)_{error} = 2.5(1.6), M(SD)_{correct} = 1.0(1.3)$ ; theta:  $t(177) =$   
464  $12.5, p < .001, d_z = 1.1, M(SD)_{error} = 2.0(2.0), M(SD)_{correct} = -0.1(1.6)$ ), along with a more  
465 negative ERN amplitude when compared to correct trials ( $t(177) = -6.3, p < .001, d_z = -0.6,$   
466  $M(SD)_{error} = -0.1(2.6), M(SD)_{correct} = 1.5(2.8)$ ).

467 Scatterplots of questionnaire total score (BDI, STAI Trait, PSWQ) by each dependent  
468 variable (delta residual power, theta residual power, ERN residual amplitude) are presented in  
469 Figures 1, 2, and 3. Pearson's correlations revealed no significant relationships between  
470 psychiatric symptoms measured by the questionnaires and error-related EEG/ERP dependent  
471 variables (see supplementary Table S3 on OSF).

472 Time-frequency plots and topographical plots for delta/theta power are presented in  
473 Figure 4 with time-frequency plots separated by group in Figure 5. Overall ERN amplitude, ERN  
474 amplitude by group, and topographical plots are presented in Figure 6. As a note, for all linear  
475 regressions, standardized beta coefficients are reported. While holding age and sex constant, BDI  
476 score, STAI trait score, and PSWQ score did not significantly predict delta power values ( $\beta_{BDI} =$   
477  $0.0, p_{BDI} = 0.53$ ;  $\beta_{STAI} = -0.00, p_{STAI} = 0.99$ ;  $\beta_{PSWQ} = 0.06, p_{PSWQ} = 0.43$ ; see Table 4).

478 Transdiagnostic measures did not significantly predict theta power values ( $\beta_{BDI} = 0.09, p_{BDI} =$   
479  $0.25$ ;  $\beta_{STAI} = 0.10, p_{STAI} = 0.20$ ;  $\beta_{PSWQ} = 0.10, p_{PSWQ} = 0.18$ ; see Table 5) nor ERN residual

480 amplitude ( $\beta_{BDI} = -0.02$ ,  $p_{BDI} = 0.77$ ;  $\beta_{STAI} = -0.07$ ,  $p_{STAI} = 0.33$ ;  $\beta_{PSWQ} = -0.10$ ,  $p_{PSWQ} = 0.18$ ;  
481 see Table 6).

### 482 **3.3 Diagnostic Linear Regressions**

483 Linear regression results for the following models are reported in Table 7. While holding  
484 age and sex constant, diagnostic group did not significantly predict delta residual power  
485 ( $\beta_{MDD \times GAD} = 0.01$ ,  $p_{MDD \times GAD} = 0.92$ ;  $\beta_{Comorbids \times GAD} = 0.06$ ,  $p_{Comorbids \times GAD} = 0.59$ ;  $\beta_{Control \times GAD} = 0.13$ ,  
486  $p_{Control \times GAD} = 0.35$ ). Similarly, diagnostic group did not significantly predict theta residual power  
487 ( $\beta_{MDD \times GAD} = -0.03$ ,  $p_{MDD \times GAD} = 0.79$ ;  $\beta_{Comorbids \times GAD} = 0.05$ ,  $p_{Comorbids \times GAD} = 0.69$ ;  $\beta_{Control \times GAD} = 0.03$ ,  
488  $p_{Control \times GAD} = 0.69$ ). Diagnostic group did not predict ERN residual values ( $\beta_{MDD \times GAD} = 0.00$ ,  
489  $p_{MDD \times GAD} = 0.99$ ;  $\beta_{Comorbids \times GAD} = -0.03$ ,  $p_{Comorbids \times GAD} = 0.78$ ;  $\beta_{Control \times GAD} = 0.03$ ,  $p_{Control \times GAD} = 0.82$ ).

490 Exploratory linear regressions that mirrored the regressions described above were  
491 performed with error trial only delta/theta power and ERN amplitude (i.e., not the residualized  
492 difference scores, but the error trials only). The results for these linear regressions are presented  
493 in the supplementary material on OSF (see supplementary material Tables S4-S7). All results  
494 mirrored the results presented above, with no questionnaire nor diagnostic group predicting  
495 delta/theta power and ERN amplitude. In addition, upon visual inspection of the data, there may  
496 have been potential outliers in the BDI, STAI Trait, and PSWQ scales. Therefore, to ensure that  
497 outliers were not driving the current results, outliers were defined as 2 times the inter-quartile  
498 range and taken out for exploratory regressions. The pattern of significance in the results did not  
499 change with the removal of these outliers. All  $p$ -values were above .23.

## 500 **4 Discussion**

501 The primary aim of the current study was to test the relationship between transdiagnostic  
502 measures of trait anxiety, worry, and depressive symptomology and neurophysiological measures

503 of error-monitoring as indexed by residualized delta/theta oscillatory power and residualized  
504 error-related negativity amplitude. Our first hypothesis that higher trait anxiety and worry would  
505 predict greater residual delta/theta power and ERN amplitude was not supported, as there was a  
506 nonsignificant prediction of the residualized values from the trait anxiety and worry  
507 questionnaires. However, our hypothesis that there would be no relationship between depressive  
508 symptoms and neurophysiological indicators of error monitoring was supported, as depressive  
509 symptoms did not predict any dependent variable. A secondary aim of the current study was to  
510 test for between-group differences in error-monitoring processes in individuals with GAD,  
511 MDD, and comorbid disorders. Our second hypothesis that individuals with GAD would exhibit  
512 higher error-related delta/theta residualized power values and residualized ERN amplitude was  
513 unsupported, as group status was a nonsignificant predictor any of delta/theta power and ERN  
514 amplitude. However, our hypothesis that those with MDD would not differ from controls was  
515 supported, as there were nonsignificant differences between those diagnosed with MDD and  
516 controls.

517         Although the results of the current study did not support all of our original hypotheses,  
518 these results are consistent with the considerable amount of heterogeneity emerging in the extant  
519 literature. When examining the results of continuous scales predicting delta/theta power and  
520 ERN amplitude, these null results align with the results of Weinberg et al. (2014), where trait  
521 worry did not relate to the magnitude of the ERN amplitude. Further, in Weinberg et al. (2012),  
522 Mood and Anxiety Symptom Questionnaire- Anxious Arousal (MASQ-AA) subscale score did  
523 not relate to error-related brain activity, suggesting that general physiological anxiety symptoms  
524 may not be related to ERN amplitude. Although anxious arousal was not directly tested in the  
525 current study, this evidence lends credence to a general idea that anxiety symptomology and

526 ERN amplitude may not be related without accounting for additional factors that may influence  
527 ERN amplitude, such as intolerance of uncertainty (Jackson, Nelson, & Hajcak, 2016). In  
528 addition, when looking at depressive symptoms, anhedonic depression symptoms do not relate to  
529 neural measures post-error (Schroder et al., 2013), along with general depressive symptoms  
530 (Chang et al., 2010), and distress/misery latent factors (Gorka, Burkhouse, Afshar, & Phan,  
531 2017). Again, these results in combination with the current results suggest depressive symptoms  
532 may not be related to delta/theta power and ERN amplitude.

533         It is plausible there is simply not a strong relationship between anxious and depressive  
534 symptomology and neurophysiological measures of error-monitoring in a large sample of people,  
535 or that the relationship depends on extraneous variables not accounted for in the current study  
536 (i.e., hidden moderator explanation). A recent meta-analysis showed the relationship between  
537 depression and the ERN in the published literature is small (Moran et al., 2017), while another  
538 meta-analysis displayed a “small-to-medium” effect between anxiety and ERN (Moser et al.,  
539 2013), although this may be overestimated due to publication bias (Moran et al., 2017). When  
540 looking at midfrontal theta oscillations, those with higher levels of trait anxiety do display  
541 enhanced theta power when performing cognitive control tasks (Cavanagh & Shackman, 2015),  
542 but this may be specific to the individual’s reactivity to uncertainty or threat. The current results  
543 add to a heterogenous body of literature and present evidence that in a relatively large sample  
544 with a wide range of psychopathology symptoms, the relationship between transdiagnostic  
545 measures of anxiety and depression and neural indices of error-monitoring may be more nuanced  
546 than originally thought.

547         Another possible explanation of the current results is that error-monitoring processes may  
548 be related to more nuanced anxiety and depressive symptoms that were not captured in the



549 measures used. We chose broad symptom measures that are commonly used in clinical settings  
550 instead of focusing on specific subscales or traits, such as anhedonia, helplessness, or rumination  
551 to name a few. It may that the relationship between neurophysiological measures of error  
552 processing and pathology are only present in very specific subdimensions. For example,  
553 individuals who experience feelings of helplessness display greater ERN amplitude when  
554 compared to those who report lower levels of helplessness (Pfabigan et al., 2013) or rumination  
555 is correlated with a more negative ERN when compared to those lower on scales of rumination  
556 (Tanovic, Hajcak, & Sanislow, 2017), suggesting that specific factors of depressive  
557 symptomology may contribute to individual differences in error-monitoring processes. Future  
558 research should continue to test which specific dimensions of depressive and anxious  
559 symptomology factors relate to error-monitoring processes in order to parse apart relationships  
560 with individual differences in error-monitoring.

561         When comparing the results of the group linear regressions to previous research, there is  
562 additional evidence that diagnostic group may not specifically relate to error-monitoring  
563 processes, along with methodological differences that may contribute to heterogeneity in the  
564 literature. When testing for group differences in error-monitoring processes, Kujawa et al. (2016)  
565 and Xiao et al. (2011) found no difference in  $\Delta$ ERN (error minus correct ERN amplitude) in  
566 individuals with GAD when compared to controls, suggesting that error-monitoring processes  
567 may not be heightened in those with GAD. However, individuals diagnosed with social anxiety  
568 disorder had a more negative  $\Delta$ ERN when compared to controls, suggesting that ERN amplitude  
569 may be differentially affected between anxiety disorders (Kujawa et al., 2016). Other studies  
570 have demonstrated that  $\Delta$ ERN was more negative in GAD, but ERN or CRN alone was not  
571 (Weinberg et al., 2012). In the current paper, residualized values between ERN and CRN values

572 were used over  $\Delta$ ERN (Meyer, Lerner, Reyes, Laird, & Hajcak, 2017), and therefore  
573 methodological decisions, such as which ERP measure to use, could have affected study  
574 outcomes. When examining the literature surrounding depression and ERN amplitude, the results  
575 of a recent meta-analysis suggest that the relationship between depression and ERN amplitude is  
576 small and that the current literature is possibly contaminated with publication bias (Moser et al.,  
577 2017).

578         The results of the current study should be considered within the appropriate limitations.  
579 Although the sample size for the linear regressions containing all continuous variables was  
580 relatively large ( $n = 178$ ), diagnostic group linear regressions had much smaller sample sizes for  
581 each subgroup ( $n_{GAD} = 14$ ,  $n_{MDD} = 28$ ,  $n_{Comorbid} = 19$ ). Therefore, it is possible we did not have  
582 enough participants in each diagnostic category to detect small differences in neural  
583 measurements of error-monitoring that existed between groups. Further, as the task employed in  
584 the current study was originally designed primarily to extract the time domain ERN, the greatest  
585 epoch length we could extract surrounding a response was 1000 ms. Thus, the lowest frequency  
586 we could extract without violating the Nyquist theorem was 1.5 Hz (Cohen, 2014) although delta  
587 frequency extends as low as 1 Hz. This lower boundary may have impeded our ability to  
588 accurately quantify frequencies in the delta frequency range. Finally, the reliability of our  
589 symptom measures is quite good; however, reliability (in this case dependability) of ERN  
590 amplitude was below the commonly-accepted level .70. Thus, the lower reliability at .63 may  
591 have reduced the possible relationship between ERN amplitude and the symptom measures and  
592 should be considered.

593         In conclusion, for the current sample, trait anxiety, worry, and depressive symptoms were  
594 not related to error related delta/theta oscillatory power or ERN. Further, diagnostic group status

595 did not predict error-related residual delta/theta power or ERN amplitude. It is possible the  
596 relationship between neural indices of error-monitoring and anxiety and depressive  
597 symptomology is more nuanced than original thought, therefore, future research should  
598 investigate various factors that could influence the relationship. It is also possible that there is not  
599 a large enough relationship between symptomology and neural indices of error-monitoring to  
600 bear out in a large sample. Future research should also investigate other individual difference  
601 traits that may influence error-monitoring to further understand what factors influence our ability  
602 to monitor errors and correct future behavior.

603

604

605

606

607

608

609

610

611

612

613

614

615

616

617

618

619

620

621

622

623

624

625

626

627

References

- 628  
629 Aarts, K., Vanderhasselt, M.-A., Otte, G., Baeken, C., & Pourtois, G. (2013). Electrical brain  
630 imaging reveals the expression and timing of altered error monitoring functions in major  
631 depression. *Journal of Abnormal Psychology, 122*(4), 939–950.  
632 <https://doi.org/10.1037/a0034616>
- 633 Baldwin, S. A., Larson, M. J., & Clayson, P. E. (2015). The dependability of  
634 electrophysiological measurements of performance monitoring in a clinical sample: A  
635 generalizability and decision analysis of the ERN and Pe. *Psychophysiology, 52*(6), 790–  
636 800. <https://doi.org/10.1111/psyp.12401>
- 637 Beck, A. T., Steer, R. A., & Brown, G. K. (1996). *Manual for the Beck Depression Inventory-II*.  
638 San Antonio, TX: Psychological Corporation.
- 639 Bergua, V., Meillon, C., Potvin, O., Bouisson, J., Le Goff, M., Rouaud, O., ... Amieva, H.  
640 (2012). The STAI-Y trait scale: Psychometric properties and normative data from a large  
641 population-based study of elderly people. *International Psychogeriatrics, 24*(7), 1163–  
642 1171. <https://doi.org/10.1017/S1041610212000300>
- 643 Cavanagh, J. F., Cohen, M. X., & Allen, J. J. B. (2009). Prelude to and resolution of an error:  
644 EEG phase synchrony reveals cognitive control dynamics during action monitoring. *The*  
645 *Journal of Neuroscience: The Official Journal of the Society for Neuroscience, 29*(1), 98–  
646 105. <https://doi.org/10.1523/JNEUROSCI.4137-08.2009>
- 647 Cavanagh, J. F., Meyer, A., & Hajcak, G. (2017). Error-Specific Cognitive Control Alterations in  
648 Generalized Anxiety Disorder. *Biological Psychiatry. Cognitive Neuroscience and*  
649 *Neuroimaging, 2*(5), 413–420. <https://doi.org/10.1016/j.bpsc.2017.01.004>
- 650 Cavanagh, J. F., & Shackman, A. J. (2015). Frontal midline theta reflects anxiety and cognitive  
651 control: Meta-analytic evidence. *Journal of Physiology, Paris, 109*(1–3), 3–15.  
652 <https://doi.org/10.1016/j.jphysparis.2014.04.003>
- 653 Chang, W.-P., Davies, P. L., & Gavin, W. J. (2010). Individual differences in error monitoring in  
654 healthy adults: Psychological symptoms and antisocial personality characteristics.  
655 *European Journal of Neuroscience, 32*(8), 1388–1396. <https://doi.org/10.1111/j.1460-9568.2010.07384.x>
- 656  
657 Chiu, P. H., & Deldin, P. J. (2007). Neural evidence for enhanced error detection in major  
658 depressive disorder. *The American Journal of Psychiatry, 164*(4), 608–616.  
659 <https://doi.org/10.1176/ajp.2007.164.4.608>
- 660 Clawson, A., Clayson, P. E., & Larson, M. J. (2013). Cognitive control adjustments and conflict  
661 adaptation in major depressive disorder. *Psychophysiology, 50*(8), 711–721.  
662 <https://doi.org/10.1111/psyp.12066>
- 663 Clawson, A., South, M., Baldwin, S., & Larson, M. (2017). Electrophysiological  
664 Endophenotypes and the Error-Related Negativity (ERN) in Autism Spectrum Disorder:  
665 A Family Study. *Journal of Autism & Developmental Disorders, 47*(5), 1436–1452.  
666 <https://doi.org/10.1007/s10803-017-3066-8>
- 667 Clayson, P. E., Carbine, K. A., Baldwin, S. A., & Larson, M. J. (2019). Methodological reporting  
668 behavior, sample sizes, and statistical power in studies of event-related potentials:  
669 Barriers to reproducibility and replicability. *Psychophysiology, 56*(11), e13437.  
670 <https://doi.org/10.1111/psyp.13437>
- 671 Clayson, P. E., & Miller, G. A. (2017a). ERP Reliability Analysis (ERA) Toolbox: An open-  
672 source toolbox for analyzing the reliability of event-related brain potentials. *International*  
673 *Journal of Psychophysiology, 111*, 68–79. <https://doi.org/10.1016/j.ijpsycho.2016.10.012>

- 674 Clayson, P. E., & Miller, G. A. (2017b). Psychometric considerations in the measurement of  
675 event-related brain potentials: Guidelines for measurement and reporting. *International*  
676 *Journal of Psychophysiology: Official Journal of the International Organization of*  
677 *Psychophysiology*, *111*, 57–67. <https://doi.org/10.1016/j.ijpsycho.2016.09.005>
- 678 Cohen, J. (1988). *Statistical power analysis for the behavioral sciences* (2nd ed). Hillsdale, N.J:  
679 L. Erlbaum Associates.
- 680 Cohen, Michael X., & Cavanagh, J. F. (2011). Single-Trial Regression Elucidates the Role of  
681 Prefrontal Theta Oscillations in Response Conflict. *Frontiers in Psychology*, *2*.  
682 <https://doi.org/10.3389/fpsyg.2011.00030>
- 683 Cohen, Michael X., & van Gaal, S. (2014). Subthreshold muscle twitches dissociate oscillatory  
684 neural signatures of conflicts from errors. *NeuroImage*, *86*, 503–513.  
685 <https://doi.org/10.1016/j.neuroimage.2013.10.033>
- 686 Cohen, M.X. (2014). *Analyzing Neural Time Series Data: Theory and Practice*. Retrieved from  
687 <https://books.google.com/books?id=rDKkAgAAQBAJ>
- 688 Compton, R. J., Carp, J., Chaddock, L., Fineman, S. L., Quandt, L. C., & Ratliff, J. B. (2007).  
689 Anxiety and Error Monitoring: Increased Error Sensitivity or Altered Expectations?  
690 *Brain and Cognition*, *64*(3), 247–256. <https://doi.org/10.1016/j.bandc.2007.03.006>
- 691 Cuthbert, B. N., & Insel, T. R. (2013). Toward the future of psychiatric diagnosis: The seven  
692 pillars of RDoC. *BMC Medicine*, *11*, 126. <https://doi.org/10.1186/1741-7015-11-126>
- 693 Dehaene, S., Posner, M. I., & Tucker, D. M. (1994). Localization of a Neural System for Error  
694 Detection and Compensation. *Psychological Science (0956-7976)*, *5*(5), 303–305.  
695 <https://doi.org/10.1111/j.1467-9280.1994.tb00630.x>
- 696 Dien, J. (2010). The ERP PCA Toolkit: An open source program for advanced statistical analysis  
697 of event-related potential data. *Journal of Neuroscience Methods*, *187*(1), 138–145.  
698 <https://doi.org/10.1016/j.jneumeth.2009.12.009>
- 699 Eriksen, B. A., & Eriksen, C. W. (1974). Effects of noise letters upon the identification of a  
700 target letter in a nonsearch task. *Perception & Psychophysics*, *16*(1), 143–149.  
701 <https://doi.org/10.3758/BF03203267>
- 702 Fischer, A. G., Danielmeier, C., Villringer, A., Klein, T. A., & Ullsperger, M. (2016). Gender  
703 Influences on Brain Responses to Errors and Post-Error Adjustments. *Scientific Reports*,  
704 *6*, 24435. <https://doi.org/10.1038/srep24435>
- 705 Gehring, W. J., Goss, B., Coles, M. G. H., Meyer, D. E., & Donchin, E. (1993). A Neural System  
706 for Error Detection and Compensation. *Psychological Science (0956-7976)*, *4*(6), 385–  
707 390. <https://doi.org/10.1111/j.1467-9280.1993.tb00586.x>
- 708 Gorka, S. M., Burkhouse, K. L., Afshar, K., & Phan, K. L. (2017). Error-related brain activity  
709 and internalizing disorder symptom dimensions in depression and anxiety. *Depression*  
710 *and Anxiety*, *34*(11), 985–995. <https://doi.org/10.1002/da.22648>
- 711 Gorka, S. M., & Phan, K. L. (2017). Impact of anxiety symptoms and problematic alcohol use on  
712 error-related brain activity. *International Journal of Psychophysiology: Official Journal*  
713 *of the International Organization of Psychophysiology*, *118*, 32–39.  
714 <https://doi.org/10.1016/j.ijpsycho.2017.05.011>
- 715 Hajcak, G., McDonald, N., & Simons, R. F. (2003). To err is autonomic: Error-related brain  
716 potentials, ANS activity, and post-error compensatory behavior. *Psychophysiology*,  
717 *40*(6), 895–903. <https://doi.org/10.1111/1469-8986.00107>

- 718 Hanna, G. L., & Gehring, W. J. (2016). The NIMH Research Domain Criteria initiative and  
719 error-related brain activity. *Psychophysiology*, *53*(3), 386–388.  
720 <https://doi.org/10.1111/psyp.12571>
- 721 Hill, K. E., Ait Oumeziane, B., Novak, K. D., Rollock, D., & Foti, D. (2018). Variation in  
722 reward- and error-related neural measures attributable to age, gender, race, and ethnicity.  
723 *International Journal of Psychophysiology: Official Journal of the International*  
724 *Organization of Psychophysiology*, *132*(Pt B), 353–364.  
725 <https://doi.org/10.1016/j.ijpsycho.2017.12.009>
- 726 Hill, K. E., Samuel, D. B., & Foti, D. (2016). Contextualizing individual differences in error  
727 monitoring: Links with impulsivity, negative affect, and conscientiousness.  
728 *Psychophysiology*, *53*(8), 1143–1153. <https://doi.org/10.1111/psyp.12671>
- 729 Holmes, A. J., & Pizzagalli, D. A. (2008). Spatiotemporal dynamics of error processing  
730 dysfunctions in major depressive disorder. *Archives of General Psychiatry*, *65*(2), 179–  
731 188. <https://doi.org/10.1001/archgenpsychiatry.2007.19>
- 732 Holmes, A. J., & Pizzagalli, D. A. (2010). Effects of task-relevant incentives on the  
733 electrophysiological correlates of error processing in major depressive disorder.  
734 *Cognitive, Affective & Behavioral Neuroscience*, *10*(1), 119–128.  
735 <https://doi.org/10.3758/CABN.10.1.119>
- 736 Jackson, F., Nelson, B. D., & Hajcak, G. (2016). The uncertainty of errors: Intolerance of  
737 uncertainty is associated with error-related brain activity | Elsevier Enhanced Reader.  
738 <https://doi.org/10.1016/j.biopsycho.2015.11.007>
- 739 Kennedy, B. L., Schwab, M., Morris, R. L., & Beldia, G. (2001). Assessment of State and Trait  
740 Anxiety in Subjects with Anxiety and Depressive Disorders. *Psychiatric Quarterly*, *72*,  
741 263–276. <https://doi.org/10.1023/A:1010305200087>
- 742 Kujawa, A., Weinberg, A., Bunford, N., Fitzgerald, K. D., Hanna, G. L., Monk, C. S., ... Phan,  
743 K. L. (2016). Error-related brain activity in youth and young adults before and after  
744 treatment for generalized or social anxiety disorder. *Progress in Neuro-*  
745 *Psychopharmacology & Biological Psychiatry*, *71*, 162–168.  
746 <https://doi.org/10.1016/j.pnpbp.2016.07.010>
- 747 Larson, M. J., Clayson, P. E., & Clawson, A. (2014). Making sense of all the conflict: A  
748 theoretical review and critique of conflict-related ERPs. *International Journal of*  
749 *Psychophysiology*, *93*(3), 283–297. <https://doi.org/10.1016/j.ijpsycho.2014.06.007>
- 750 Larson, M. J., South, M., & Clayson, P. E. (2011). Sex differences in error-related performance  
751 monitoring. *Neuroreport*, *22*(1), 44–48.  
752 <https://doi.org/10.1097/WNR.0b013e3283427403>
- 753 Luck, S. J. (2005). *An Introduction to the Event-Related Potential Technique*. Cambridge, MA:  
754 MIT Press.
- 755 Luck, S. J., & Gaspelin, N. (2017). How to get statistically significant effects in any ERP  
756 experiment (and why you shouldn't). *Psychophysiology*, *54*(1), 146–157.  
757 <https://doi.org/10.1111/psyp.12639>
- 758 Luu, P., & Tucker, D. M. (2001). Regulating action: Alternating activation of midline frontal and  
759 motor cortical networks. *Clinical Neurophysiology: Official Journal of the International*  
760 *Federation of Clinical Neurophysiology*, *112*(7), 1295–1306.  
761 [https://doi.org/10.1016/s1388-2457\(01\)00559-4](https://doi.org/10.1016/s1388-2457(01)00559-4)
- 762 Meyer, A., Lerner, M. D., Reyes, A. D. L., Laird, R. D., & Hajcak, G. (2017). Considering ERP  
763 difference scores as individual difference measures: Issues with subtraction and



- 764 alternative approaches. *Psychophysiology*, *54*(1), 114–122.  
765 <https://doi.org/10.1111/psyp.12664>
- 766 Meyer, A., Nelson, B., Perlman, G., Klein, D. N., & Kotov, R. (2018). A neural biomarker, the  
767 error-related negativity, predicts the first onset of generalized anxiety disorder in a large  
768 sample of adolescent females. *Journal of Child Psychology and Psychiatry, and Allied*  
769 *Disciplines*, *59*(11), 1162–1170. <https://doi.org/10.1111/jcpp.12922>
- 770 Meyer, T. J., Miller, M. L., Metzger, R. L., & Borkovec, T. D. (1990). Development and  
771 validation of the Penn State Worry Questionnaire. *Behaviour Research and Therapy*,  
772 *28*(6), 487–495. [https://www.doi.org/10.1016/0005-7967\(90\)90135-6](https://www.doi.org/10.1016/0005-7967(90)90135-6)
- 773 Mohamed, S. M. H., Börger, N. A., Geuze, R. H., & van der Meere, J. J. (2019). Error  
774 monitoring and daily life executive functioning. *Experimental Brain Research*, *237*(9),  
775 2217–2229. <https://doi.org/10.1007/s00221-019-05589-w>
- 776 Moran, T. P., Schroder, H. S., Kneip, C., & Moser, J. S. (2017). Meta-analysis and  
777 psychophysiology: A tutorial using depression and action-monitoring event-related  
778 potentials. *International Journal of Psychophysiology: Official Journal of the*  
779 *International Organization of Psychophysiology*, *111*, 17–32.  
780 <https://doi.org/10.1016/j.ijpsycho.2016.07.001>
- 781 Moser, J. S., Hajcak, G., & Simons, R. F. (2005). The effects of fear on performance monitoring  
782 and attentional allocation. *Psychophysiology*, *42*(3), 261–268.  
783 <https://doi.org/10.1111/j.1469-8986.2005.00290.x>
- 784 Moser, J. S., Moran, T. P., & Jendrusina, A. A. (2012). Parsing relationships between dimensions  
785 of anxiety and action monitoring brain potentials in female undergraduates.  
786 *Psychophysiology*, *49*(1), 3–10. <https://doi.org/10.1111/j.1469-8986.2011.01279.x>
- 787 Moser, J. S., Moran, T. P., Kneip, C., Schroder, H. S., & Larson, M. J. (2016). Sex moderates the  
788 association between symptoms of anxiety, but not obsessive compulsive disorder, and  
789 error-monitoring brain activity: A meta-analytic review. *Psychophysiology*, *53*(1), 21–29.  
790 <https://doi.org/10.1111/psyp.12509>
- 791 Moser, J. S., Moran, T. P., Schroder, H. S., Donnellan, M. B., & Yeung, N. (2013). On the  
792 relationship between anxiety and error monitoring: A meta-analysis and conceptual  
793 framework. *Frontiers in Human Neuroscience*, *7*.  
794 <https://doi.org/10.3389/fnhum.2013.00466>
- 795 Munneke, G.-J., Nap, T. S., Schippers, E. E., & Cohen, M. X. (2015). A statistical comparison of  
796 EEG time- and time-frequency domain representations of error processing. *Brain*  
797 *Research*, *1618*, 222–230. <https://doi.org/10.1016/j.brainres.2015.05.030>
- 798 Neo, P. S.-H., & McNaughton, N. (2011). Frontal theta power linked to neuroticism and  
799 avoidance. *Cognitive, Affective & Behavioral Neuroscience*, *11*(3), 396–403.  
800 <https://doi.org/10.3758/s13415-011-0038-x>
- 801 Nitschke, J. B., Heller, W., Imig, J. C., McDonald, R. P., & Miller, G. A. (2001). Distinguishing  
802 Dimensions of Anxiety and Depression. *Cognitive Therapy and Research*, *25*(1), 1–22.  
803 <https://doi.org/10.1023/A:1026485530405>
- 804 Olvet, D., & Hajcak, G. (2008). The error-related negativity (ERN) and psychopathology:  
805 Toward an endophenotype. *Clinical Psychology Review*, *28*(8), 1343–1354.  
806 <https://doi.org/10.1016/j.cpr.2008.07.003>
- 807 Olvet, D. M., Klein, D. N., & Hajcak, G. (2010). Depression symptom severity and error-related  
808 brain activity. *Psychiatry Research*, *179*(1), 30–37.  
809 <https://doi.org/10.1016/j.psychres.2010.06.008>

- 810 Pfabigan, D. M., Pintzinger, N. M., Siedek, D. R., Lamm, C., Derntl, B., & Sailer, U. (2013).  
811 Feelings of helplessness increase ERN amplitudes in healthy individuals.  
812 *Neuropsychologia*, *51*(4), 613–621.  
813 <https://doi.org/10.1016/j.neuropsychologia.2012.12.008>
- 814 Proudfit, G. H., Inzlicht, M., & Mennin, D. S. (2013). Anxiety and error monitoring: The  
815 importance of motivation and emotion. *Frontiers in Human Neuroscience*, *7*.  
816 <https://doi.org/10.3389/fnhum.2013.00636>
- 817 Rabbitt, P., & Rodgers, B. (1977). What does a man do after he makes an error? An analysis of  
818 response programming. *Quarterly Journal of Experimental Psychology*, *29*(4), 727–743.  
819 <https://doi.org/10.1080/14640747708400645>
- 820 Riesel, A., Kathmann, N., & Endrass, T. (2014). Overactive performance monitoring in  
821 obsessive-compulsive disorder is independent of symptom expression. *European*  
822 *Archives of Psychiatry & Clinical Neuroscience*, *264*(8), 707–717.  
823 <https://doi.org/10.1007/s00406-014-0499-3>
- 824 Schimmel, H. (1967). The (+) reference: Accuracy of estimated mean components in average  
825 response studies. *Science (New York, N.Y.)*, *157*(3784), 92–94.  
826 <https://doi.org/10.1126/science.157.3784.92>
- 827 Schmidt, B., Kanis, H., Holroyd, C. B., Miltner, W. H. R., & Hewig, J. (2018). Anxious  
828 gambling: Anxiety is associated with higher frontal midline theta predicting less risky  
829 decisions. *Psychophysiology*, *55*(10), e13210. <https://doi.org/10.1111/psyp.13210>
- 830 Schroder, H. S., Moran, T. P., Infantolino, Z. P., & Moser, J. S. (2013). The relationship between  
831 depressive symptoms and error monitoring during response switching. *Cognitive,*  
832 *Affective & Behavioral Neuroscience*, *13*(4), 790–802. [https://doi.org/10.3758/s13415-](https://doi.org/10.3758/s13415-013-0184-4)  
833 [013-0184-4](https://doi.org/10.3758/s13415-013-0184-4)
- 834 Sheehan, D. V., Lecrubier, Y., Sheehan, K. H., Amorim, P., Janavs, J., Weiller, E., ... Dunbar,  
835 G. C. (1998). The Mini-International Neuropsychiatric Interview (M.I.N.I.): The  
836 development and validation of a structured diagnostic psychiatric interview for DSM-IV  
837 and ICD-10. *The Journal of Clinical Psychiatry*, *59* Suppl 20, 22-33;quiz 34-57.
- 838 Spielberger, C. D., Gorsuch, R. L., & Lushere, R. E. (1970). *The State-Trait Anxiety Inventory*  
839 *(test manual)*.
- 840 Tamnes, C. K., Walhovd, K. B., Torstveit, M., Sells, V. T., & Fjell, A. M. (2013). Performance  
841 monitoring in children and adolescents: A review of developmental changes in the error-  
842 related negativity and brain maturation. *Developmental Cognitive Neuroscience*, *6*, 1–13.  
843 <https://doi.org/10.1016/j.dcn.2013.05.001>
- 844 Tanovic, E., Hajcak, G., & Sanislow, C. A. (2017). Rumination is associated with diminished  
845 performance monitoring. *Emotion (Washington, D.C.)*, *17*(6), 953–964.  
846 <https://doi.org/10.1037/emo0000290>
- 847 van Veen, V., & Carter, C. S. (2002). The anterior cingulate as a conflict monitor: fMRI and  
848 ERP studies. *Physiology & Behavior*, *77*(4–5), 477–482. [https://doi.org/10.1016/s0031-](https://doi.org/10.1016/s0031-9384(02)00930-7)  
849 [9384\(02\)00930-7](https://doi.org/10.1016/s0031-9384(02)00930-7)
- 850 Weinberg, A., Klein, D. N., & Hajcak, G. (2012). Increased error-related brain activity  
851 distinguishes generalized anxiety disorder with and without comorbid major depressive  
852 disorder. *Journal of Abnormal Psychology*, *121*(4), 885–896.  
853 <https://doi.org/10.1037/a0028270>
- 854 Weinberg, A., Kotov, R., & Proudfit, G. H. (2015). Neural indicators of error processing in  
855 generalized anxiety disorder, obsessive-compulsive disorder, and major depressive



- 856 disorder. *Journal of Abnormal Psychology*, 124(1), 172–185.  
857 <https://doi.org/10.1037/abn0000019>
- 858 Weinberg, A., Liu, H., Hajcak, G., & Shankman, S. A. (2015). Blunted Neural Response to  
859 Rewards as a Vulnerability Factor for Depression: Results from a Family Study. *Journal*  
860 *of Abnormal Psychology*, 124(4), 878–889. <https://doi.org/10.1037/abn0000081>
- 861 Weinberg, A., Liu, H., & Shankman, S. A. (2016). Blunted neural response to errors as a trait  
862 marker of melancholic depression. *Biological Psychology*, 113, 100–107.  
863 <https://doi.org/10.1016/j.biopsycho.2015.11.012>
- 864 Weinberg, A., Olvet, D. M., & Hajcak, G. (2010). Increased error-related brain activity in  
865 generalized anxiety disorder. *Biological Psychology*, 85(3), 472–480.  
866 <https://doi.org/10.1016/j.biopsycho.2010.09.011>
- 867 Whisman, M. A., Perez, J. E., & Ramel, W. (2000). Factor structure of the Beck Depression  
868 Inventory-Second Edition (BDI-II) in a student sample. *Journal of Clinical Psychology*,  
869 56(4), 545–551. [https://doi.org/10.1002/\(sici\)1097-4679\(200004\)56:4<545::aid-](https://doi.org/10.1002/(sici)1097-4679(200004)56:4<545::aid-jclp7>3.0.co;2-u)  
870 [jclp7>3.0.co;2-u](https://doi.org/10.1002/(sici)1097-4679(200004)56:4<545::aid-jclp7>3.0.co;2-u)
- 871 Xiao, Z., Wang, J., Zhang, M., Li, H., Tang, Y., Wang, Y., ... Fromson, J. A. (2011). Error-  
872 related negativity abnormalities in generalized anxiety disorder and obsessive-compulsive  
873 disorder. *Progress in Neuro-Psychopharmacology & Biological Psychiatry*, 35(1), 265–  
874 272. <https://doi.org/10.1016/j.pnpbp.2010.11.022>
- 875 Yordanova, J., Falkenstein, M., Hohnsbein, J., & Kolev, V. (2004). Parallel systems of error  
876 processing in the brain. *NeuroImage*, 22, 590–602.  
877 <https://doi.org/10.1016/j.neuroimage.2004.01.040>
- 878  
879  
880  
881  
882  
883  
884  
885  
886  
887  
888  
889  
890  
891  
892  
893  
894  
895  
896  
897  
898  
899  
900  
901

902 Author Note

903 This research was supported by the Brigham Young University College of Family, Home, and

904 Social Sciences.

905 There was no conflict of interest while conducting this study.

906 For reprints: Michael J. Larson. [michael\\_larson@byu.edu](mailto:michael_larson@byu.edu)

907 Acknowledgements: We thank Issac Prows and Joseph Fair for their assistance in data collection.

908

909

910

911

912

913

914

915

916

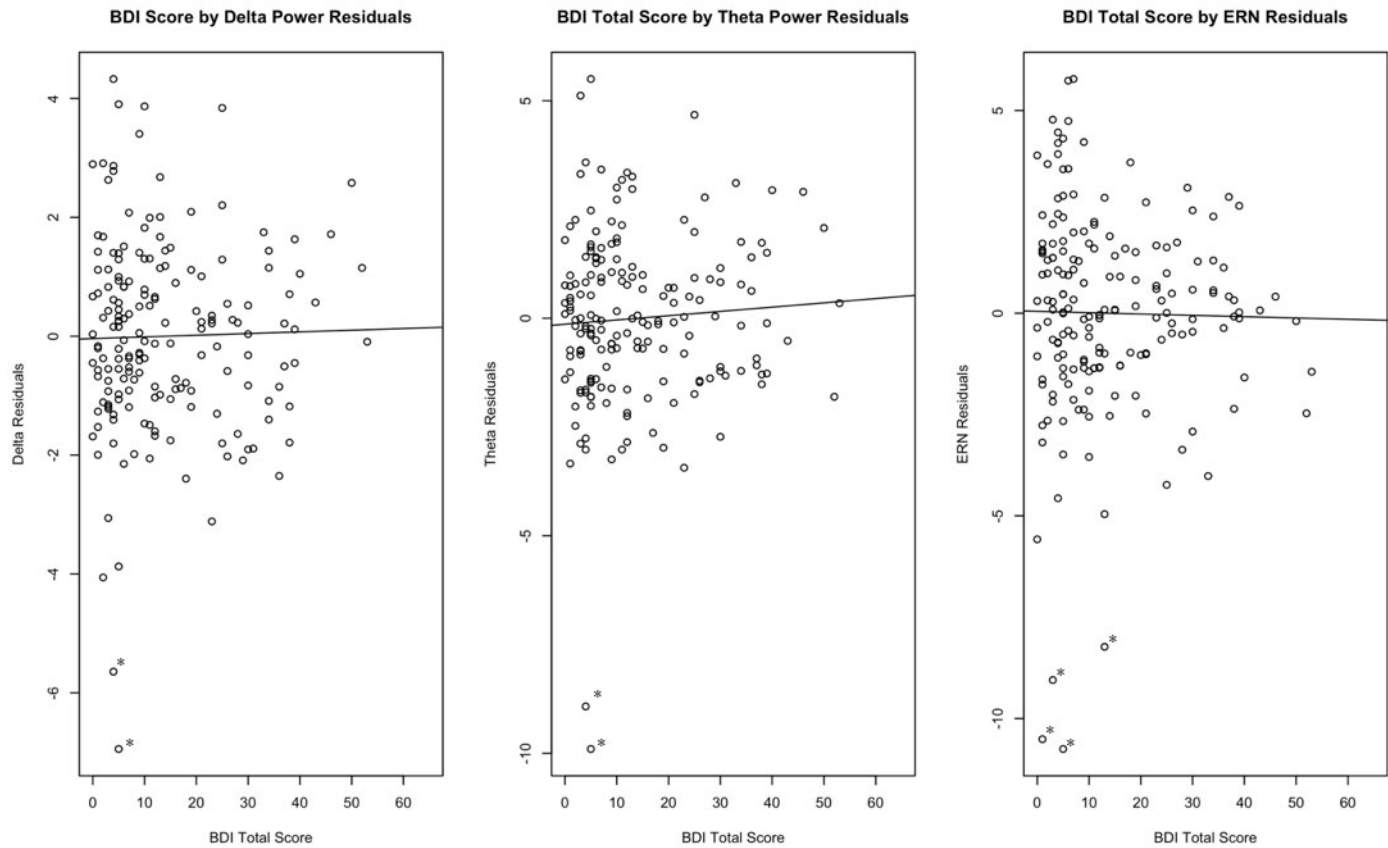

917

918 *Figure 1:* Beck Depression Inventory (BDI-II) total score by dependent variables. Possible BDI-

919 II scores range from 0 to 60.

920 \* Outliers are marked with an asterisk. Outliers were identified as 2 times the inter-quartile range

921 and taken out for exploratory regressions. Results did not change. All  $p > .23$ .

922

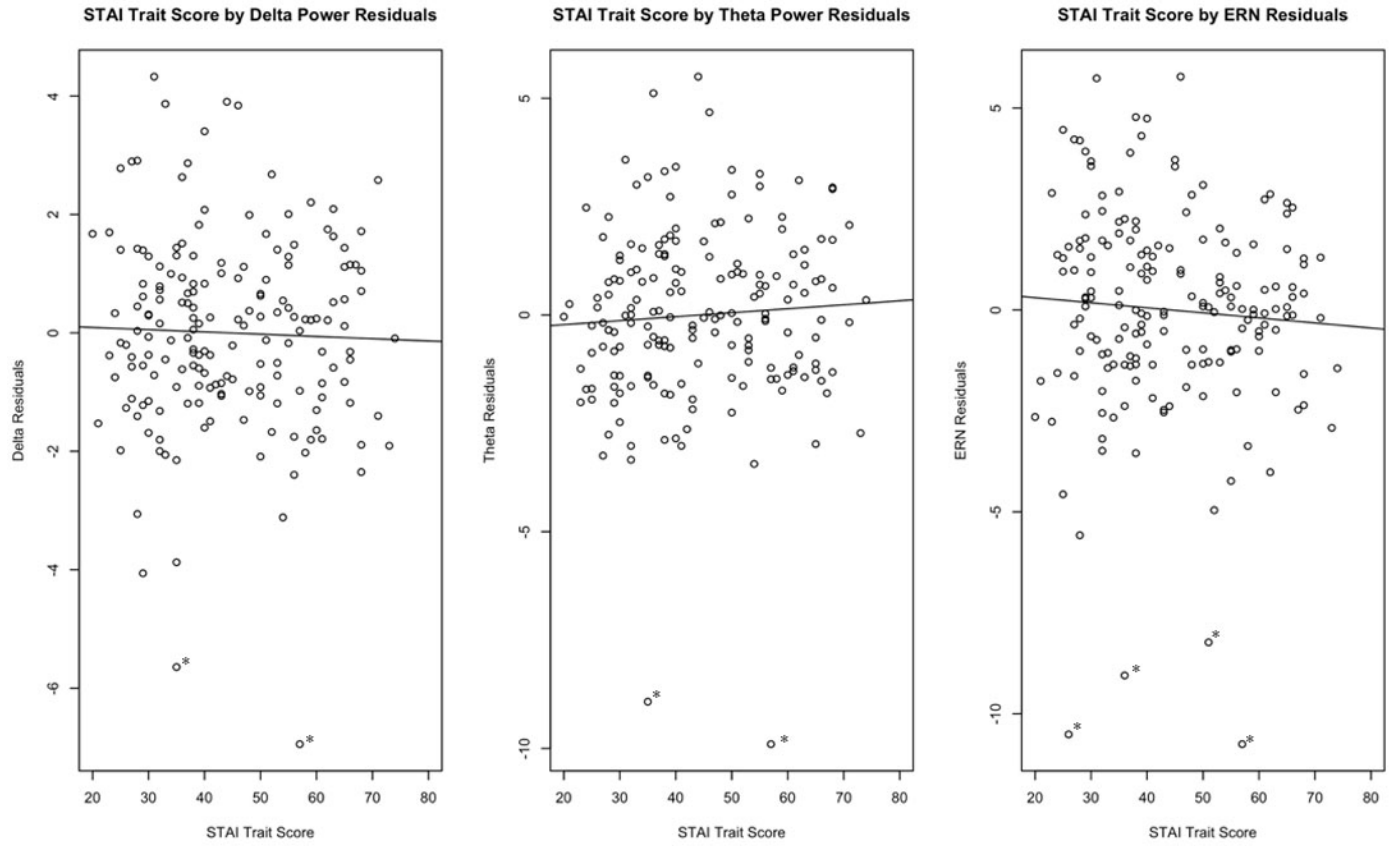

923

924 *Figure 2: State Trait Anxiety (STAI) trait scale by dependent variables. Possible STAI scores*

925 range from 20-80.

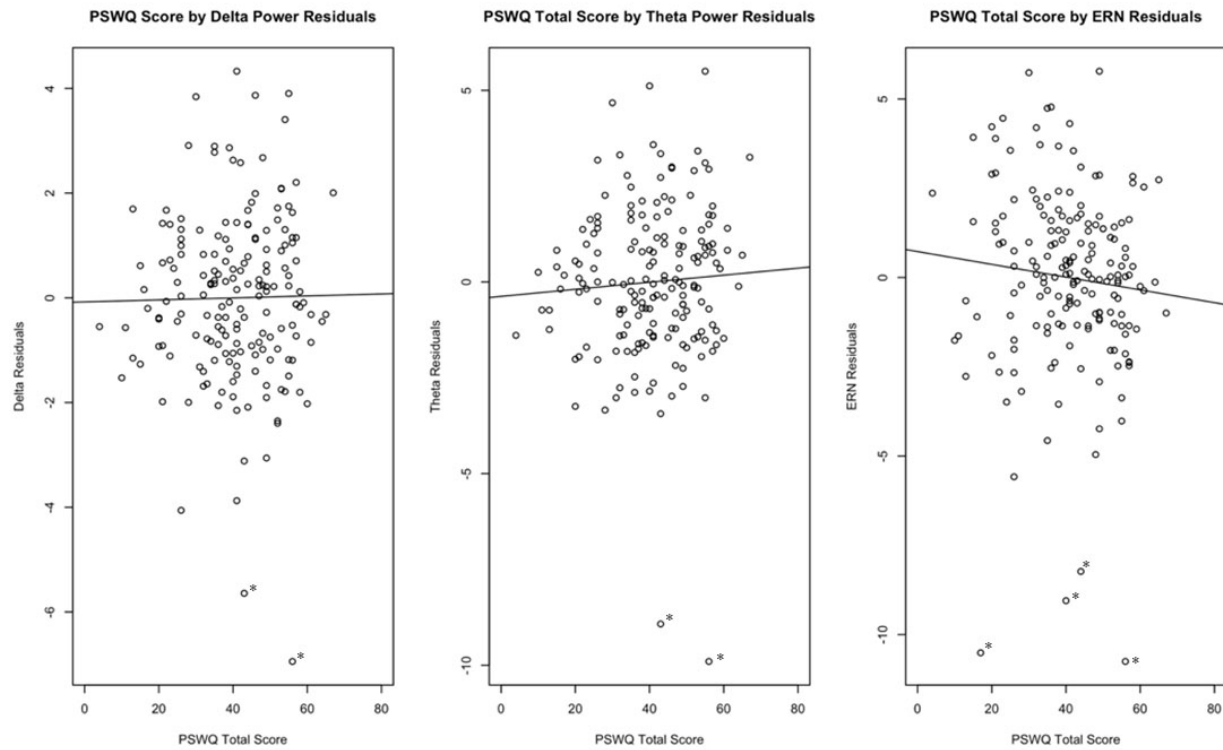

926

927

928 *Figure 3: Penn State Worry Questionnaire score by dependent variables. Possible PSWQ scores*  
929 *range from 0 to 80.*

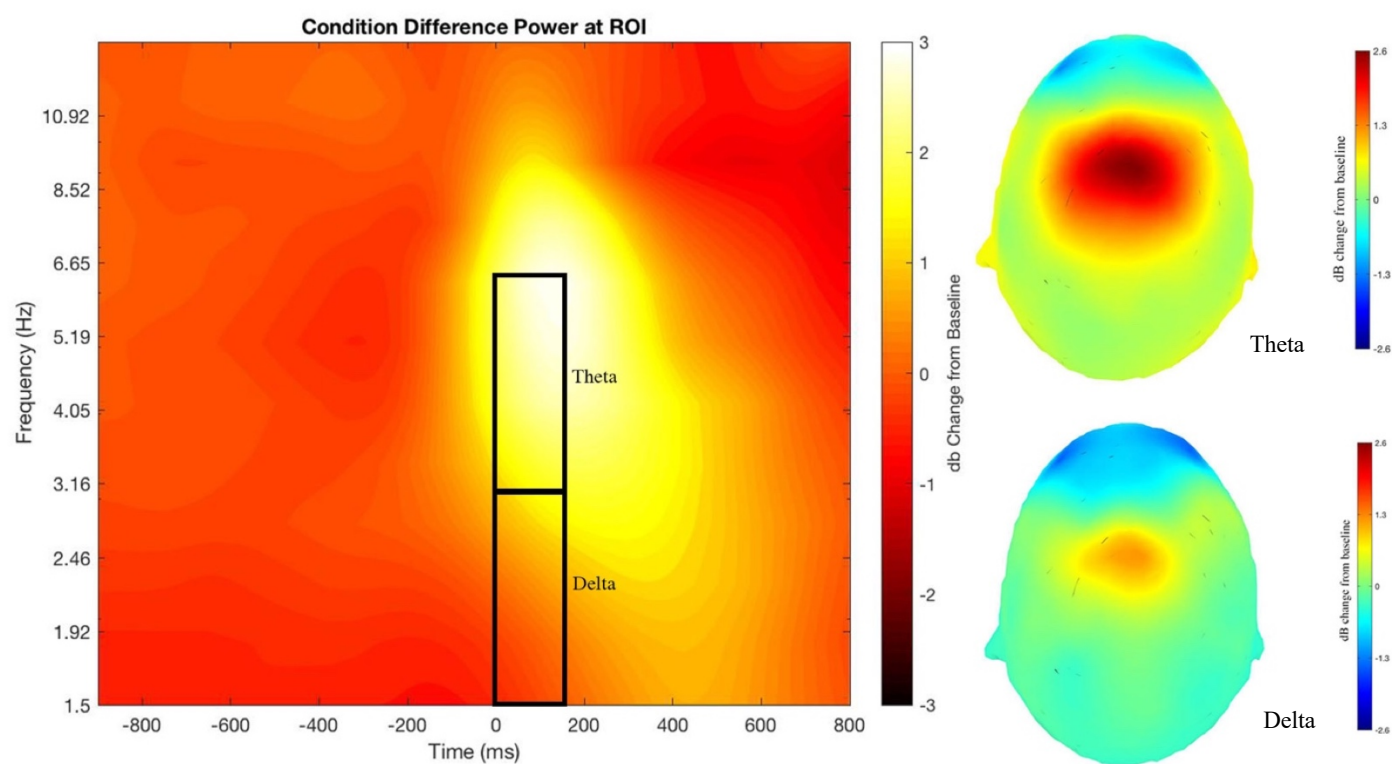

930

931 *Figure 4: Time-frequency and topographical plots of delta and theta difference power (error*  
932 *minus correct).*

933

934

935

936

937

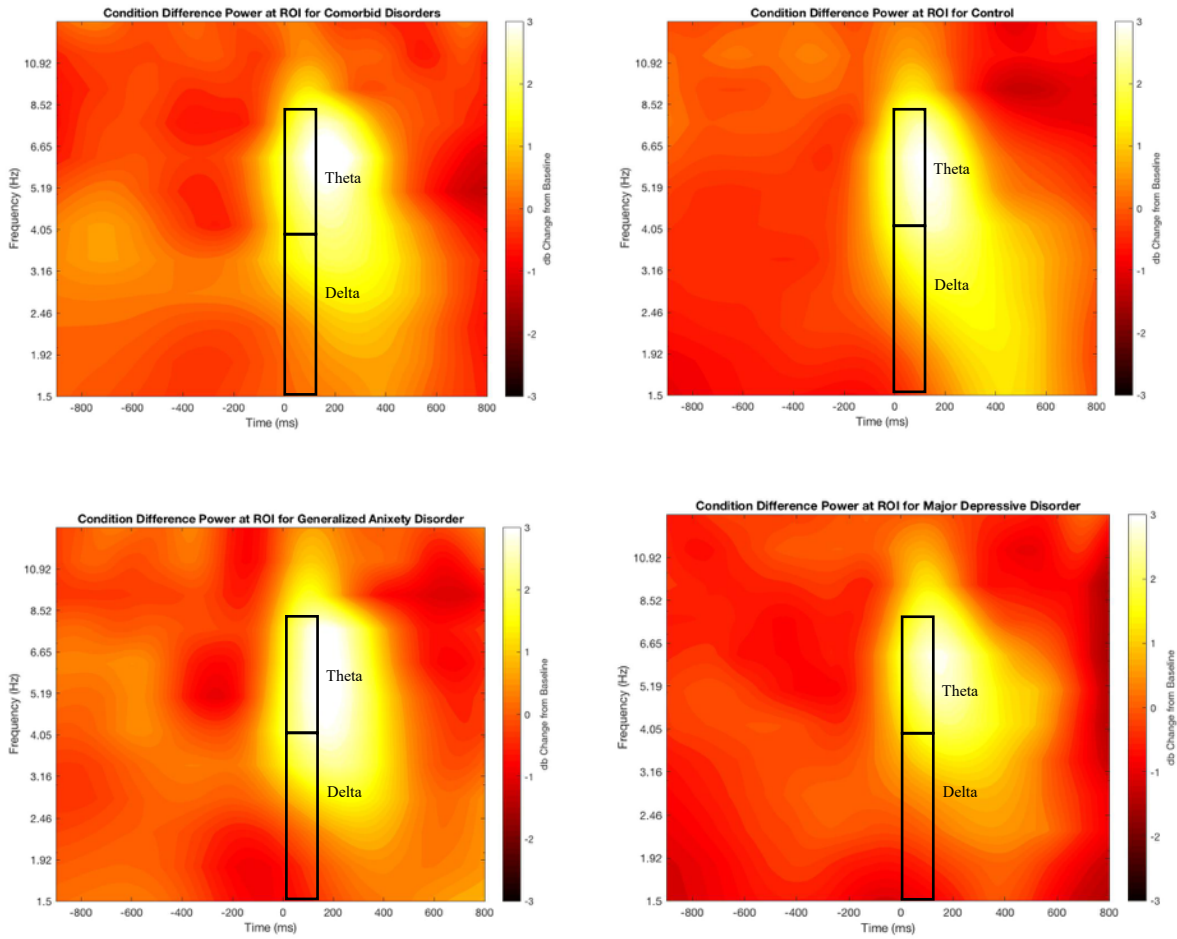

939

940 *Figure 5: Time-frequency plots of delta and theta difference power separated by group*

941

942

943

944

945

946

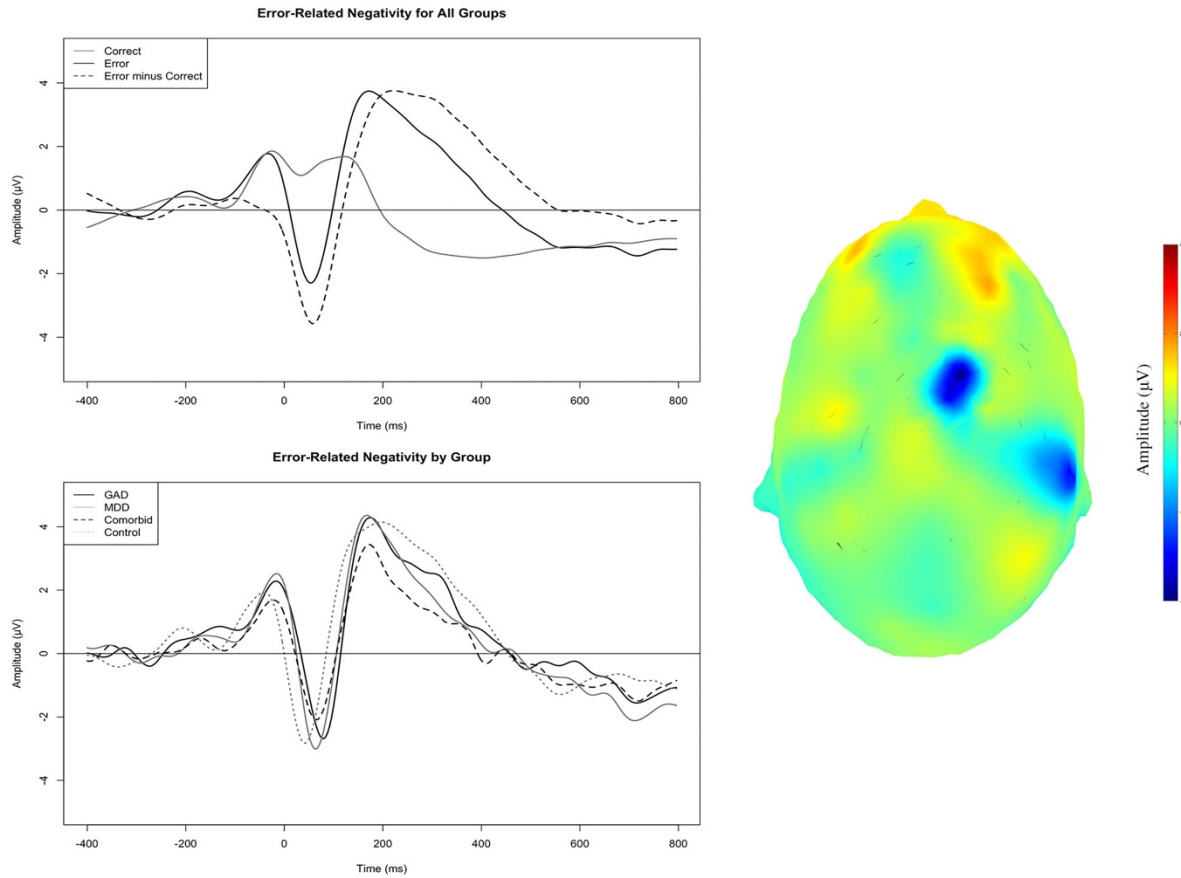

947

948 *Figure 6: Plots of error-related negativity (ERN). Topographical plot is the difference ERN*  
949 *(error minus correct).*

950

951

952

953

954

955

956

957

958

959



SYMPTOM DIMENSIONS AND ERROR-MONITORING

Table 1

*Means and standard deviations for demographics and questionnaires*

|      | Group    | Mean  | Standard Deviation | Range (min,max) | Chronbach's Alpha |
|------|----------|-------|--------------------|-----------------|-------------------|
| Age  | Overall  | 21.67 | 4.59               | 18,53           |                   |
|      | GAD      | 22.07 | 4.53               | 18, 32          |                   |
|      | MDD      | 21.89 | 2.15               | 18,26           |                   |
|      | Comorbid | 22.53 | 6.56               | 18,47           |                   |
|      | Control  | 20.61 | 2.27               | 18, 27          |                   |
| BDI  | Overall  | 13.97 | 12.45              | 0,53            | 0.95              |
|      | GAD      | 17.36 | 9.29               | 3,34            | 0.88              |
|      | MDD      | 21.07 | 12.17              | 1,39            | 0.93              |
|      | Comorbid | 25.68 | 17.82              | 0,53            | 0.95              |
|      | Control  | 5.85  | 4.57               | 0,21            | 0.81              |
| PSWQ | Overall  | 40.68 | 12.68              | 4,67            | 0.93              |
|      | GAD      | 46.57 | 8.4                | 32, 61          | 0.9               |
|      | MDD      | 43.54 | 9.97               | 25, 58          | 0.92              |
|      | Comorbid | 50.29 | 8.51               | 34, 64          | 0.89              |
|      | Control  | 34.99 | 13.66              | 4, 67           | 0.92              |
| STAI | Overall  | 44.23 | 13.6               | 20, 74          | 0.95              |
|      | GAD      | 52.93 | 10.83              | 29, 66          | 0.91              |
|      | MDD      | 52.82 | 11.53              | 24, 68          | 0.91              |
|      | Comorbid | 59.35 | 8.65               | 45, 74          | 0.83              |
|      | Control  | 34.42 | 7.29               | 20, 55          | 0.85              |

960  
961  
962  
963  
964  
965  
966  
967  
968  
969  
970  
971  
972  
973

Table 2

*Means and standard deviations for dependent variables and trial numbers.*

|                                  | Group    | Mean  | Standard Deviation | Range (min,max) |
|----------------------------------|----------|-------|--------------------|-----------------|
| Error delta                      | Overall  | 2.46  | 1.41               | -4.85, 6.79     |
|                                  | GAD      | 2.07  | 1.46               | 0.22, 4.80      |
|                                  | MDD      | 2.17  | 2.04               | -4.85, 6.45     |
|                                  | Comorbid | 2.39  | 1.41               | 0.48, 5.40      |
|                                  | Control  | 2.65  | 1.62               | -1.35, 6.79     |
| Correct delta                    | Overall  | 0.99  | 1.31               | 2.50, 8.59      |
|                                  | GAD      | 0.94  | 1.08               | -1.21, 2.51     |
|                                  | MDD      | 0.87  | 0.97               | -1.81, 2.34     |
|                                  | Comorbid | 0.98  | 0.86               | -0.40, 3.18     |
|                                  | Control  | 0.89  | 1.33               | -2.50, 8.59     |
| Error theta                      | Overall  | 1.95  | 2.06               | -8.67, 7.70     |
|                                  | GAD      | 2.06  | 1.62               | -1.35, 4.40     |
|                                  | MDD      | 1.80  | 2.70               | -8.67, 6.97     |
|                                  | Comorbid | 2.34  | 2.01               | 0.03, 5.43      |
|                                  | Control  | 1.94  | 2.03               | -3.68, 7.70     |
| Correct Theta                    | Overall  | -0.14 | 1.56               | -7.29, 11.87    |
|                                  | GAD      | 0.17  | 1.09               | -2.15, 2.16     |
|                                  | MDD      | -0.10 | 0.89               | -2.30, 1.15     |
|                                  | Comorbid | 0.18  | 1.02               | -1.44, 3.07     |
|                                  | Control  | -0.46 | 1.42               | -7.29, 5.30     |
| Error-related negativity (ERN)   | Overall  | -0.12 | 2.59               | -11.19, 7.29    |
|                                  | GAD      | -0.18 | 1.56               | -2.28, 2.52     |
|                                  | MDD      | -0.17 | 2.75               | -11.19, 4.11    |
|                                  | Comorbid | -0.42 | 1.78               | -3.06, 3.70     |
|                                  | Control  | -0.03 | 2.81               | -9.51, 7.29     |
| Correct-related negativity (CRN) | Overall  | 1.46  | 2.75               | -11.87, 18.38   |
|                                  | GAD      | 1.06  | 1.10               | -0.76, 3.37     |
|                                  | MDD      | 1.38  | 2.12               | -3.62, 5.02     |
|                                  | Comorbid | 1.08  | 1.66               | -1.42, 3.77     |
|                                  | Control  | 1.78  | 3.17               | -11.87, 18.38   |

SYMPTOM DIMENSIONS AND ERROR-MONITORING

|                |          |        |        |          |
|----------------|----------|--------|--------|----------|
| Correct Trials | Overall  | 648.7  | 114.62 | 164, 784 |
|                | GAD      | 662.79 | 103.12 | 443, 771 |
|                | MDD      | 629.82 | 140.68 | 192, 775 |
|                | Comorbid | 606.16 | 151.65 | 164,779  |
|                | Control  | 652.81 | 102.16 | 278, 773 |
| Error Trials   | Overall  | 47.4   | 31.07  | 10, 170  |
|                | GAD      | 49.36  | 29.52  | 14, 108  |
|                | MDD      | 58.89  | 31.23  | 18, 136  |
|                | Comorbid | 49.47  | 32.15  | 14, 119  |
|                | Control  | 40.13  | 28.69  | 11, 158  |

---

*Note:* Correct trials were randomly selected to match the number of error trials in the time-frequency data analyses

Delta/Theta power = db Change from Baseline

ERN/CRN = microvolts

974  
975  
976  
977  
978  
979  
980  
981  
982  
983  
984  
985  
986  
987  
988  
989  
990  
991  
992  
993  
994  
995  
996  
997  
998  
999  
1000  
1001

Table 3  
*Means and standard deviations for task accuracy  
 and response time*

|                                           | Group    | Mean   | Standard<br>Deviation | Range<br>(min,max) |
|-------------------------------------------|----------|--------|-----------------------|--------------------|
| Overall flanker accuracy (%)              | Overall  | 91     | 6                     | 57, 98             |
|                                           | GAD      | 91     | 5                     | 82, 98             |
|                                           | MDD      | 90     | 6                     | 74, 97             |
|                                           | Comorbid | 90     | 6                     | 76, 98             |
|                                           | Control  | 92     | 6                     | 57, 98             |
| Congruent trial flanker<br>accuracy (%)   | Overall  | 96     | 5                     | 61, 100            |
|                                           | GAD      | 96     | 3                     | 91, 100            |
|                                           | MDD      | 95     | 5                     | 75, 100            |
|                                           | Comorbid | 95     | 6                     | 79, 99             |
|                                           | Control  | 96     | 5                     | 61, 100            |
| Incongruent trial flanker<br>accuracy (%) | Overall  | 88     | 7                     | 54, 99             |
|                                           | GAD      | 87     | 7                     | 74, 97             |
|                                           | MDD      | 85     | 8                     | 70, 97             |
|                                           | Comorbid | 86     | 7                     | 73, 97             |
|                                           | Control  | 89     | 7                     | 54, 99             |
| Overall flanker RT                        | Overall  | 413.32 | 31.68                 | 317, 493.5         |
|                                           | GAD      | 413.64 | 32.63                 | 368, 477.5         |
|                                           | MDD      | 402.54 | 33.15                 | 329.5, 472         |
|                                           | Comorbid | 405.37 | 39.64                 | 317, 455           |
|                                           | Control  | 419.08 | 30.04                 | 350, 493.5         |
| Congruent flanker RT                      | Overall  | 371.32 | 31.93                 | 278, 460           |
|                                           | GAD      | 367.36 | 30.58                 | 315, 421           |
|                                           | MDD      | 360.14 | 34.17                 | 291, 433           |
|                                           | Comorbid | 371.42 | 43.78                 | 278, 436           |
|                                           | Control  | 375.89 | 30.14                 | 313, 460           |
| Incongruent flanker RT                    | Overall  | 441.01 | 32.43                 | 368, 525           |
|                                           | GAD      | 446.79 | 37.67                 | 401, 521           |
|                                           | MDD      | 432.43 | 32.85                 | 369, 496           |
|                                           | Comorbid | 431.21 | 32.78                 | 368, 477           |
|                                           | Control  | 445.68 | 31.74                 | 383, 525           |

Table 4

*Multiple linear regressions with diagnostic group predicting delta power residual values*

|                   | $\beta$ | $t$     | $\Delta R^2$ | VIF  | $F$  | $df$  | Adj. $R^2$ | Cohen's $f^2$ |
|-------------------|---------|---------|--------------|------|------|-------|------------|---------------|
| <b>BDI</b>        |         |         |              |      | 2.9  | 3,174 | 0.03       | 0.05          |
| BDI               | 0.05    | 0.63    | 0.00         | 1.02 |      |       |            |               |
| Age               | -0.01   | -0.19   | 0.00         | 1.07 |      |       |            |               |
| Sex               | -0.22   | -2.88** | 0.05         | 1.08 |      |       |            |               |
| <b>STAI Trait</b> |         |         |              |      | 2.76 | 3,174 | 0.03       | 0.05          |
| STAI Trait        | -0.00   | -0.01   | 0.00         | 1.03 |      |       |            |               |
| Age               | -0.01   | -0.14   | 0.00         | 1.09 |      |       |            |               |
| Sex               | -0.22   | -2.78   | 0.04         | 1.10 |      |       |            |               |
| <b>PSWQ</b>       |         |         |              |      | 2.98 | 3,174 | 0.03       | 0.05          |
| PSWQ              | 0.06    | 0.78    | 0.00         | 1.06 |      |       |            |               |
| Age               | -0.02   | -0.25   | 0.00         | 1.09 |      |       |            |               |
| Sex               | -0.23   | -2.93   | 0.05         | 1.11 |      |       |            |               |

Note: VIF = variance inflation factor.

\* $p < 0.5$ , \*\* $p < .01$ , \*\*\* $p < .001$

1002  
1003  
1004  
1005  
1006  
1007  
1008  
1009  
1010  
1011  
1012  
1013  
1014  
1015  
1016  
1017  
1018  
1019  
1020  
1021  
1022  
1023  
1024

Table 5

*Multiple linear regressions with diagnostic group predicting theta power residual values*

|                   | $\beta$ | $t$     | $\Delta R^2$ | VIF  | $F$  | $df$  | Adj. $R^2$ | Cohen's $f^2$ |
|-------------------|---------|---------|--------------|------|------|-------|------------|---------------|
| <b>BDI</b>        |         |         |              |      | 2.42 | 3,174 | 0.02       | 0.04          |
| BDI               | 0.09    | 1.15    | 0.01         | 1.02 |      |       |            |               |
| Age               | -5.00   | -0.66   | 0.00         | 1.07 |      |       |            |               |
| Sex               | -0.20   | -2.67*  | 0.04         | 1.08 |      |       |            |               |
| <b>STAI Trait</b> |         |         |              |      | 2.54 | 3,174 | 0.03       | 0.04          |
| STAI              |         |         |              |      |      |       |            |               |
| Trait             | 0.10    | 1.28    | 0.01         | 1.04 |      |       |            |               |
| Age               | -0.06   | -0.75   | 0.00         | 1.09 |      |       |            |               |
| Sex               | -0.20   | -2.63   | 0.04         | 1.10 |      |       |            |               |
| <b>PSWQ</b>       |         |         |              |      | 2.60 | 3,174 | 0.03       | 0.05          |
| PSWQ              | 0.10    | 1.36    | 0.01         | 1.06 |      |       |            |               |
| Age               | -0.06   | -0.76   | 0.00         | 1.09 |      |       |            |               |
| Sex               | -0.21   | -2.68** | 0.04         | 1.12 |      |       |            |               |

*Note:* VIF = variance inflation factor.

\* $p < 0.5$ , \*\* $p < .01$ , \*\*\* $p < .001$

1025  
1026  
1027  
1028  
1029  
1030  
1031  
1032  
1033  
1034  
1035  
1036  
1037  
1038  
1039  
1040  
1041  
1042  
1043  
1044  
1045  
1046  
1047  
1048  
1049

SYMPTOM DIMENSIONS AND ERROR-MONITORING

Table 6

*Multiple linear regressions with diagnostic group predicting ERN residual amplitude*

|                   | $\beta$ | $t$   | $\Delta R^2$ | VIF  | $F$  | $df$  | Adj. $R^2$ | Cohen's $f^2$ |
|-------------------|---------|-------|--------------|------|------|-------|------------|---------------|
| <b>BDI</b>        |         |       |              |      | 0.72 | 3,174 | 0.00       | 0.01          |
| BDI               | -0.02   | -0.29 | 0.00         | 1.02 |      |       |            |               |
| Age               | -0.06   | -0.75 | 0.00         | 1.07 |      |       |            |               |
| Sex               | 0.08    | 1.02  | 0.00         | 1.08 |      |       |            |               |
| <b>STAI Trait</b> |         |       |              |      | 1.02 | 3,174 | 0.00       | 0.02          |
| STAI Trait        |         |       |              |      |      |       |            |               |
| Trait             | -0.07   | -0.97 | 0.01         | 1.04 |      |       |            |               |
| Age               | -0.05   | -0.63 | 0.00         | 1.09 |      |       |            |               |
| Sex               | 0.09    | 1.15  | 0.01         | 1.10 |      |       |            |               |
| <b>PSWQ</b>       |         |       |              |      | 1.31 | 3,174 | 0.01       | 0.02          |
| PSWQ              | -0.10   | 1.35  | 0.01         | 1.06 |      |       |            |               |
| Age               | -0.05   | -0.57 | 0.00         | 1.09 |      |       |            |               |
| Sex               | 0.10    | 1.27  | 0.01         | 1.12 |      |       |            |               |

Note: VIF = variance inflation factor.

\* $p < 0.5$ , \*\* $p < .01$ , \*\*\* $p < .001$

1050  
1051  
1052  
1053  
1054  
1055  
1056  
1057  
1058  
1059  
1060  
1061  
1062  
1063  
1064  
1065  
1066  
1067  
1068  
1069  
1070  
1071  
1072  
1073  
1074



Table 7

*Multiple linear regressions with diagnostic group predicting residual values*

|                                              | $\beta$ | $t$   | $\Delta R^2$ | VIF  | $F$  | $df$   | Adj. $R^2$ | Cohen's $f^2$ |  |
|----------------------------------------------|---------|-------|--------------|------|------|--------|------------|---------------|--|
| <b>Delta Residual Power Model with Group</b> |         |       |              |      | 1.72 | 5, 140 | 0.02       | 0.06          |  |
| MDD x GAD                                    | 0.00    | 0.97  | 0.01         | 1.09 |      |        |            |               |  |
| Comorbid x GAD                               | 0.01    | 0.1   |              |      |      |        |            |               |  |
| Control x GAD                                | 0.06    | 0.54  |              |      |      |        |            |               |  |
| Age                                          | -0.09   | -1.1  | 0.01         | 1.13 |      |        |            |               |  |
| Sex                                          | -0.19   | -2.27 | 0.03         | 1.09 |      |        |            |               |  |
| <b>Theta Error Residual Model with Group</b> |         |       |              |      | 1.53 | 5,140  | 0.02       | 0.05          |  |
| MDD x GAD                                    | 0.00    | 1.24  | 0.01         | 1.09 |      |        |            |               |  |
| Comorbid x GAD                               | -0.03   | -0.27 |              |      |      |        |            |               |  |
| Control x GAD                                | 0.05    | 0.4   |              |      |      |        |            |               |  |
| Age                                          | -0.10   | -1.11 | 0.01         | 1.13 |      |        |            |               |  |
| Sex                                          | -0.21   | -2.49 | 0.04         | 1.09 |      |        |            |               |  |
| <b>ERN Residual Model with Group</b>         |         |       |              |      | 0.53 | 5, 140 | -0.02      | 0.02          |  |
| MDD x GAD                                    | 0.00    | -1.00 | 0.00         | 1.09 |      |        |            |               |  |
| Comorbid x GAD                               | 0.00    | 0.02  |              |      |      |        |            |               |  |
| Control x GAD                                | -0.03   | -0.29 |              |      |      |        |            |               |  |
| Age                                          | 0.08    | 0.90  | 0.01         | 1.13 |      |        |            |               |  |
| Sex                                          | 0.13    | 1.50  | 0.02         | 1.09 |      |        |            |               |  |

Note: VIF = variance inflation factor.

\*p<0.5, \*\*p<.01, \*\*\*p<.001
